# Supplementary material for: High levels of interspecific gene flow in an endemic cichlid fish adaptive radiation from an extreme lake environment
Source: PubMed Central journal article supplement (PMC4973668; doi:10.1111/mec.13247), 2015-06-19
Supplement: MEC-24-3421-s002.pdf [file MEC-24-3421-s002.pdf]

# Extensive gene flow among soda lake cichlid species

## Supplementary Information

|                                                                                                  |           |
|--------------------------------------------------------------------------------------------------|-----------|
| <b>Supplementary Information table of contents</b> .....                                         | <b>1</b>  |
| <b>SI Methods</b> .....                                                                          | <b>2</b>  |
| <i>RAD library construction</i> .....                                                            | 2         |
| <i>Estimation of the extent of linkage disequilibrium</i> .....                                  | 2         |
| <i>Additional STRUCTURE analysis</i> .....                                                       | 3         |
| <b>SI Results</b> .....                                                                          | <b>3</b>  |
| <i>Generation of a genome-wide SNP dataset using RAD Sequencing</i> .....                        | 3         |
| <i>Additional STRUCTURE analysis</i> .....                                                       | 4         |
| <i>Effect of data quality filtering on phylogenomic signal</i> .....                             | 4         |
| <i>Phylogenomic inference using next generation sequencing (NGS) datasets</i> .....              | 4         |
| <b>SI References</b> .....                                                                       | <b>6</b>  |
| <b>SI Figures</b> .....                                                                          | <b>7</b>  |
| Figure S1. Catchment area of the Natron-Magadi basin. ....                                       | 7         |
| Figure S2. Plots of linkage disequilibrium dropoff with distance by species. ....                | 8         |
| Figure S3. ML phylogeny for variable sites using ASC_model. ....                                 | 9         |
| Figure S4. ML phylogenies generated from additional RAD datasets. ....                           | 10        |
| Figure S5. Species tree by SNAPP analysis for selected populations.....                          | 11        |
| Figure S6. Visualisation of K=2-5 for <i>Alcolapia</i> STRUCTURE analysis.....                   | 12        |
| Figure S7. Visualisation of K=2-5, sympatric <i>Alcolapia</i> STRUCTURE analysis                 | 13        |
| Figure S8. Visualisation of K=2-5 for <i>A. alcalica</i> STRUCTURE analysis. ....                | 14        |
| Figure S9. Frequency histograms of sliding-window $F_{ST}$ values.....                           | 15        |
| Figure S10. Highest scoring windows in the sliding-window $F_{ST}$ analysis.....                 | 16        |
| Figure S11. Mean inter-specimen uncorrected p-distance. ....                                     | 17        |
| <b>SI Tables</b> .....                                                                           | <b>18</b> |
| Table S1. Collection co-ordinates and sequencing statistics per sample. ....                     | 18        |
| Table S2. Data subsets and respective analyses conducted on RAD data.....                        | 21        |
| Table S3. Population pairwise $F_{ST}$ . ....                                                    | 22        |
| Table S4. Bayescan outlier loci for <i>A. alcalica</i> vs <i>A. grahami</i> comparison.....      | 23        |
| Table S5. Bayescan outlier loci for <i>A. alcalica</i> vs <i>A. latilabris</i> comparison.....   | 24        |
| Table S6. Bayescan outlier loci for <i>A. alcalica</i> vs <i>A. ndalalani</i> comparison. ....   | 25        |
| Table S7. Bayescan outlier loci for <i>A. latilabris</i> vs <i>A. ndalalani</i> comparison. .... | 26        |
| Table S8. Outlier SNPs and predicted gene annotations. ....                                      | 28        |
| Table S9. Mantel test results. ....                                                              | 29        |

## SI Methods

### ***RAD library construction***

**Phenol/Chloroform extraction protocol, modified from (Sambrook & Russel 2001)**

1. Place tissue sample in 1.5mL Eppendorff tube with 500µL extraction buffer with SDS (recipe below) and 15µL Proteinase K
2. Incubate at 37°C for 6 hours or 55°C for 4 hours. [RAD: 55°C for 1 hour]
3. Vortex and spin down
4. Add 4µL RNase A and incubate for 2 minutes
5. Mix by overhead inversion for 10 minutes
6. Add 75µL NaCl 5M and mix by inversion for 10 mins
7. Add 650µL Phenol:Chloroform:Isoamyl Alcohol (25:24:1) – in fume cupboard
8. Mix by overhead inversion for 10 mins
9. Centrifuge: 15 mins at 10,000 RPM
10. Remove supernatant phase to new tube – in fume cupboard
11. Add 1000µL ice cold 100% ethanol (stored in freezer)
12. Put samples in freezer -20 °C for >1 hour
13. Centrifuge: 15 mins at 15,000 RPM at 4 °C
14. Pour off ethanol (being careful not to dislodge pellet at bottom of tube)
15. Add 1500µL ice cold 70% ethanol (from freezer)
16. Centrifuge: 10 mins at 13,000 RPM 4 °C
17. Pour off ethanol (taking care not to dislodge pellet)
18. Dry samples on hot blocks at 37 °C for ~15 mins
19. Resuspend pellet in 50-75µL distilled H<sub>2</sub>O or DNA storage buffer (TE)

### **Extraction buffer (100 mL)**

- 10mL Tris-HCl 1M (pH=8)
- 2mL EDTA 0.5M
- 2mL NaCl 5M
- 0.5mL SDS 20%
- 85.5mL dH<sub>2</sub>O

### ***Estimation of the extent of linkage disequilibrium***

We estimated LD for each species using the R package *snpstats* (Clayton & Leung 2007), (with R scripts modified from (Martin *et al.* 2013) ) using the reference-aligned dataset. We estimated LD for pairs of SNPs within each linkage group, and then averaged the correlation coefficient  $r^2$  across all linkage groups within pre-specified distance bins. We did not include in our calculations any scaffolds that were not assigned to specific linkage groups of the reference genome (i.e., those positions within the genome designated as unknown scaffolds, which accounted for 22% of our full alignment; dataset C, table S2). Varying the values of the MAF threshold and the allowed limit of missing data, as well as the number of individuals included per species, had large effects on the dropoff rate of LD, so we used conservative thresholds in our final analysis. LD was estimated for each species separately using only SNPs from the aligned dataset with a minimum allele frequency (MAF) of 0.2 and for sites at which there was data for a minimum of 80% of individuals. We present LD dropoff plots for analysis using 12 individuals per species for all the *Alcolapia* species. Additionally, for *A. grahami* we include a plot for  $n=8$  which includes only the Lake Magadi samples, and excludes those from the introduced population in Lake Nakuru. Given the apparent divergence between lakes for *O. amphimelas*, we present only the analysis of LD dropoff

for *O. amphimelas* samples from Lake Eyasi (n=4); although including the additional samples from Lake Manyara had little impact on the result (data not shown).

### **Additional STRUCTURE analysis**

In addition to the STRUCTURE analysis of the entire *Alcolapia* dataset described in the main manuscript, we also conducted analyses on subsets of the data. As the full-dataset STRUCTURE runs indicated differences in cluster membership between allopatric and sympatric sites, we also conducted STRUCTURE analysis on a dataset containing only individuals occurring sympatrically in Lake Natron (sites 005 and 011) and ran these analyses separately and combined, with a minimum of 500kb between SNPs and the following parameters: site 05: 12 individuals; 2,180 SNPs;  $\lambda=0.8$ ; K=1-8; site 11: 12 individuals; 2,160 SNPs;  $\lambda=0.8$ ; K=1-8; site 05 and 11 combined: 24 individuals; 2,227 SNPs;  $\lambda=1.1$ ; K=1-16.

As the *Alcolapia* dataset indicated separation within the *A. alcalica* samples (see Results section), we also repeated the analysis on a separate dataset containing only *A. alcalica* samples (38 samples, 2,222 SNPs), with an obtained value of  $\lambda=0.7184$ , for five independent runs at each K value of K=1–8.

## **SI Results**

### **Generation of a genome-wide SNP dataset using RAD Sequencing**

A total of 83.6 Gb of sequence was produced, of which 89% successfully mapped to the *O. niloticus* reference genome in the alignment stage. Mapping rates were generally consistent across species, although slightly lower for *A. grahami* than the other species (mean mapping rates: *O. amphimelas*: 89.9%; *A. alcalica*: 88.8%; *A. latilabris*: 88.7%; *A. ndalalani*: 88.8%, *A. grahami*: 86.7%). Individual mapping rates per sample are given in Table S1. Following removal of duplicates and poorly paired reads, the dataset comprised 272,360,470 paired reads. From these filtered reads, a total of 1,229,734,617 calls were generated using the GATK UnifiedGenotyper (mean: 12,809,736; range 313,244–21,316,544 calls). Five samples with fewer than 2.5 million calls were removed from further analysis, resulting in a dataset of 91 samples (84 *Alcolapia* species and 7 *O. amphimelas*). Quality filtering (see *Methods* for specific parameters) resulted in a final dataset of 28,560,699 retained sites, representing ~3% of the reference genome. The final dataset comprised 544,916 sites that were variable across the whole alignment including *O. niloticus* (1.91%), of which 238,203 sites were variable across *Alcolapia* samples and 164,014 sites were variable across *A. alcalica* samples alone.

A separate dataset was compiled from reads that did not map to the *O. niloticus* reference genome, as such reads are likely to lie in more divergent regions of the genome. After quality filtering as for the mapped reads, the dataset contained a total of 436,839 sites, of which 5,832 (1.34%) were variable across the 91-sample dataset. The combined dataset of mapped and unmapped reads resulted in a total alignment of 550,748 variable sites (fewer than that from the mapped dataset alone as the *O. niloticus* reference sites were removed before combining).

### **Additional STRUCTURE analysis**

The STRUCTURE analysis for the full dataset (presented in the main paper) gave optima for the K value of K=3 and K=4. When the Lake Natron sympatric sites were analysed separately (Figure S7), both site 05 and site 011 had an LnP(K) optimum of K=1 and an Evanno method optimum at K=2, but the cluster membership differed between sites, with the site 05 analysis indicating most likely membership to a single cluster across all species, while site 011 indicated different cluster membership proportions by species. When analysed jointly, optima were seen at K=2 and K=4, with the latter K value indicating differing cluster membership between species, and between populations with *A. alcalica* (Figure S7). Given the separation of northern and southern *A. alcalica* populations indicated by both the phylogenetic inference and STRUCTURE analyses, we also conducted STRUCTURE analysis on a dataset including only the *A. alcalica* samples (dataset Q) in order to disentangle population clustering within this species. Replicate runs gave an optimum of K=1, suggesting that populations within *A. alcalica* are not sufficiently diverged to detect population structure within the species at this scale (Figure S8).

### **Effect of data quality filtering on phylogenomic signal**

As in previous analyses of very young cichlid radiations (Wagner *et al.* 2013), we found that inclusion of maximal data from RAD sequencing gave the best phylogenomic resolution, and that removal of additional data in filtering and QC steps (e.g., imposing thresholds for maximum amount of missing data, using higher SNP quality thresholds or higher threshold for individual inclusion) resulted in poorer phylogenomic resolution in ML analysis. This reflects phylogenetic analysis of simulated RAD data, showing that missing data do not appear to negatively impact phylogenetic accuracy, but low levels of informative data may do so (Rubin *et al.* 2012). Thus, we finally used a dataset imposing minimal threshold for missing data (including all sites with data for >2 individuals), a moderate SNP quality threshold (20) and removed only those individuals with considerably lower sequencing quality than the rest of the dataset (<2.5 million sequenced reads; a total of five individuals). While it may seem intuitively preferable to use maximal stringency in filtering to ensure optimally clean data, several recent analyses have revealed that such stringency may obscure phylogenomic signal in noisy datasets, removing important information in the form of outlier data (Huang & Knowles 2014), and that increased stringency in filtering thresholds may reduce accuracy of downstream analyses e.g., (Hoffman *et al.* 2014)

### **Phylogenomic inference using next generation sequencing (NGS) datasets**

Despite the considerable increase in phylogenetically informative data from NGS, difficulties remain in finding the best way to analyse such large datasets. Of note, the RAD methodology was originally developed for population-level studies (Baird *et al.* 2008; Hohenlohe *et al.* 2010) and have only recently begun to be used in phylogenetic analysis. The more recent studies that investigate phylogeny using RAD data have typically employed phylogenomic inference using matrices of concatenated sequence data from resultant RAD

loci rather than using SNP datasets (e.g., (Wagner *et al.* 2013). Phylogenetic algorithms have typically been developed for sequence data and do not handle concatenated SNP data well as it contains no invariant sites (Bertels *et al.* 2014), and may violate assumptions of rate heterogeneity, especially as large datasets often preclude the use of partitioning programs to assign different substitution models to different regions. Using the entire sequence data from RAD sampling (rather than only the variable sites) becomes computationally intensive with increase in taxon number, and it seems that taxa number rather than alignment length is the limiting factor in such analysis. For example, our reduced-taxon dataset (n=25; 26 million bp) took 3 days to complete analysis, whereas the full-taxon dataset (n=92; 28 million bp) would have taken >6 months to complete.

Thus, using only variable sites that are phylogenetically informative seems an intuitive way by which to reduce the dataset to feasible size. However we found that using a SNP-only dataset reduced the confidence of ML branch partitions, and at least one species-level node (*A. grahami*) was unable to be placed with any confidence, even when using the RAxML ASC\_ model (ascertainment bias correction) suggested for SNP datasets, while this node was robustly resolved in the analysis of the full sequence data (Figure 2 in the main text).

As our reduced-taxon dataset was assembled from the individuals with highest sequence quality in each population, we also checked that levels of missing data in the full-taxon SNP-only dataset were not impacting results. However, imposing maximum thresholds of missing data in SNP datasets (maximum 50% and 0% missing data) did not increase bootstrap support or resolve species relationships more robustly (results not shown).

It has been suggested that ascertainment bias correction may not be appropriate for SNP alignments (Pettengill *et al.* 2014), although employing GTRGAMMA with and without the ASC model in our dataset produced very similar results (Figures 2C and S3). Though it should be noted that the results are not directly comparable as these models were run on different datasets given the removal of ambiguous bases from the alignment for use of the ASC\_ model, as the ASC\_ model will not run on alignments containing invariant sites, and sites that contain ambiguous bases are considered invariant if the ambiguous base could be determined to be the same as non-ambiguous bases at that site, and there are no other polymorphic bases at that site (RAxML 8 manual). While ambiguous bases in Sanger-produced sequences typically indicate lack of confidence in base-calling rather than genuine heterozygosity, those in NGS datasets are usually called only if reaching a minimum coverage in both alternative bases and so are more likely represent a heterozygous locus, and so certain assumptions from existing phylogenetic models may well be unsuited to such SNP datasets.

While we highlight some of the difficulties here in the use of NGS data for phylogenetic purposes, it is undoubtedly the case that these datasets have already provided resolution to previously unanswered questions, and the continued updating of existing phylogenetic models with SNP-only datasets, along with the development of SNP-specific protocols (e.g., SNAPP program used in our analysis) will continue to refine and enhance the inferences that can be made from such datasets.

## SI References

- Baird NA, Etter PD, Atwood TS *et al.* (2008) Rapid SNP discovery and genetic mapping using sequenced RAD markers. *PLoS ONE*, **3**, e3376.
- Bertels F, Silander OK, Pachkov M, Rainey PB, van Nimwegen E (2014) Automated reconstruction of whole-genome phylogenies from short-sequence reads. *Molecular Biology and Evolution*, **31**, 1077–1088.
- Clayton D, Leung H-T (2007) An R package for analysis of whole-genome association studies. *Human Heredity*, **64**, 45–51.
- Hoffman JI, Simpson F, David P *et al.* (2014) High-throughput sequencing reveals inbreeding depression in a natural population. *Proceedings of the National Academy of Sciences of the United States of America*, **111**, 3775–3780.
- Hohenlohe PA, Bassham S, Etter PD *et al.* (2010) Population genomics of parallel adaptation in threespine stickleback using sequenced RAD tags. *PLoS Genetics*, **6**, e1000862.
- Huang H, Knowles LL (2014) Unforeseen consequences of excluding missing data from next-generation sequences: simulation study of RAD sequences. *Systematic Biology*, **0**, 1–9.
- Martin SH, Dasmahapatra KK, Nadeau NJ *et al.* (2013) Genome-wide evidence for speciation with gene flow in *Heliconius* butterflies. *Genome Research*, **23**, 1817–1828.
- Pettengill JB, Luo Y, Davis S *et al.* (2014) An evaluation of alternative methods for constructing phylogenies from whole genome sequence data: a case study with *Salmonella*. *PeerJ*, **2**, e620.
- Roberts N, Taieb M, Barker P *et al.* (1993) Timing of the Younger Dryas event in East Africa from lake level changes. *Nature*, **366**, 146–148.
- Rubin BER, Ree RH, Moreau CS (2012) Inferring phylogenies from RAD sequence data (S-O Kolokotronis, Ed.). *PLoS ONE*, **7**, e33394.
- Sambrook J, Russel DW (2001) Commonly Used Techniques in Molecular Cloning Co. In: *Molecular Cloning*. Cold Spring Harbor Laboratory Press, Cold Spring Harbor, NY, USA.
- Wagner CE, Keller I, Wittwer S *et al.* (2013) Genome-wide RAD sequence data provide unprecedented resolution of species boundaries and relationships in the Lake Victoria cichlid adaptive radiation. *Molecular Ecology*, **22**, 787–798.

## SI Figures

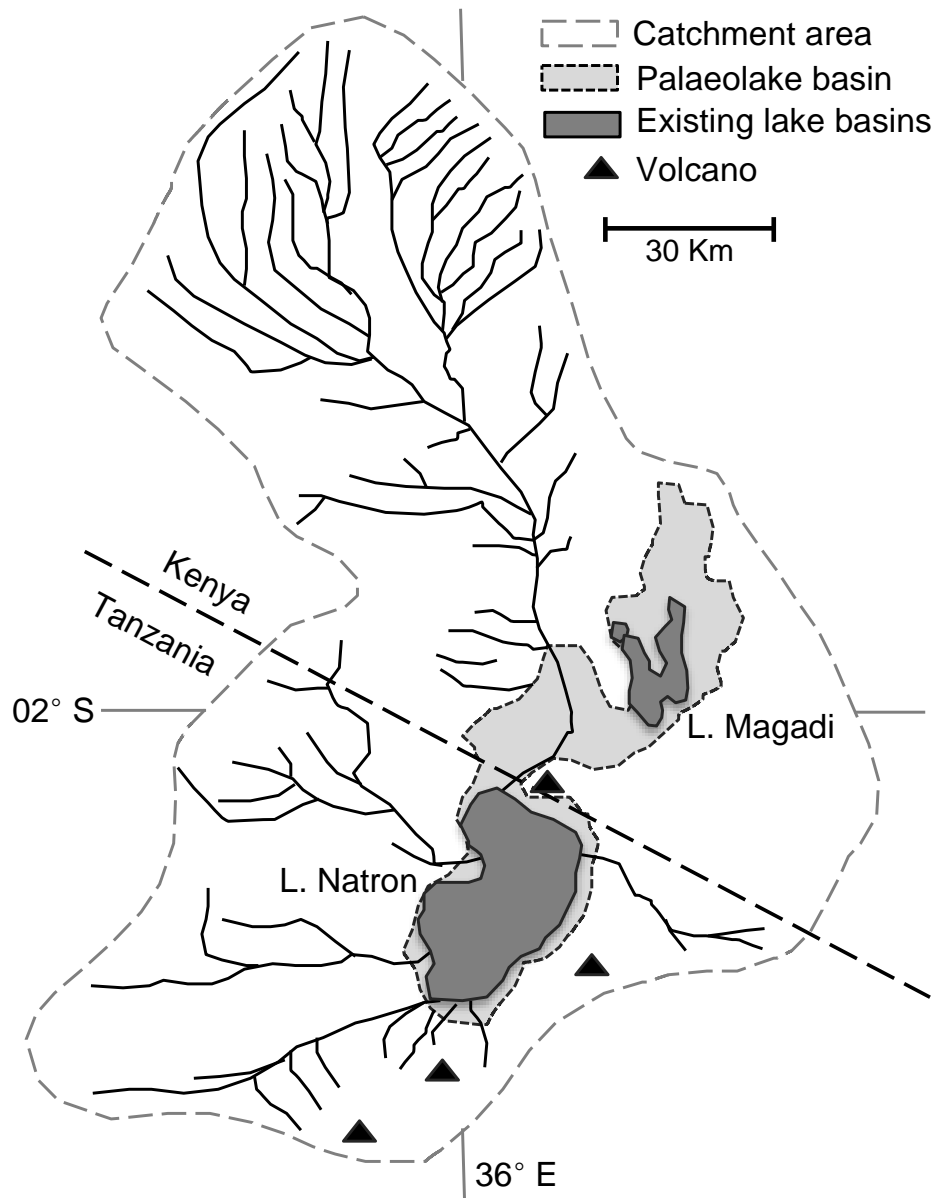

**Figure S1. Catchment area of the Natron-Magadi basin.**  
Hydrological system and extent of palaeolake and modern lake boundaries.  
Modified from (Roberts *et al.* 1993).

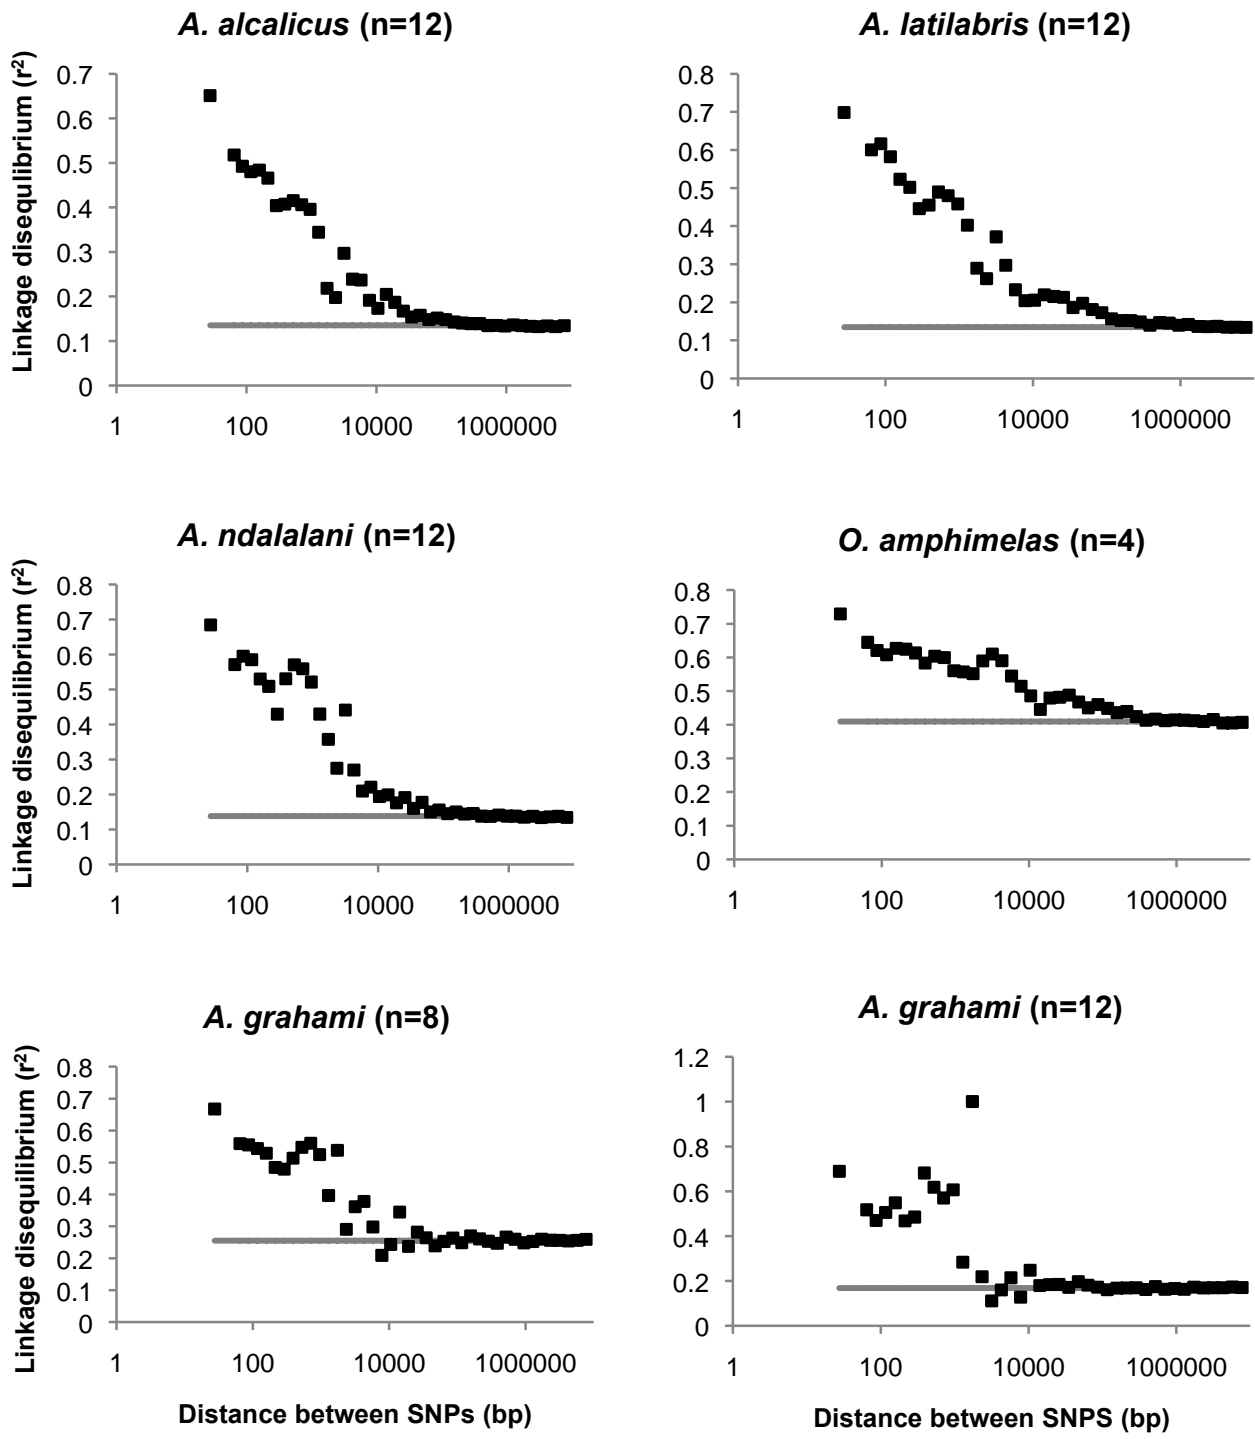

**Figure S2. Linkage disequilibrium dropoff with distance by species.**  
 Grey line in each plot indicates background LD level.



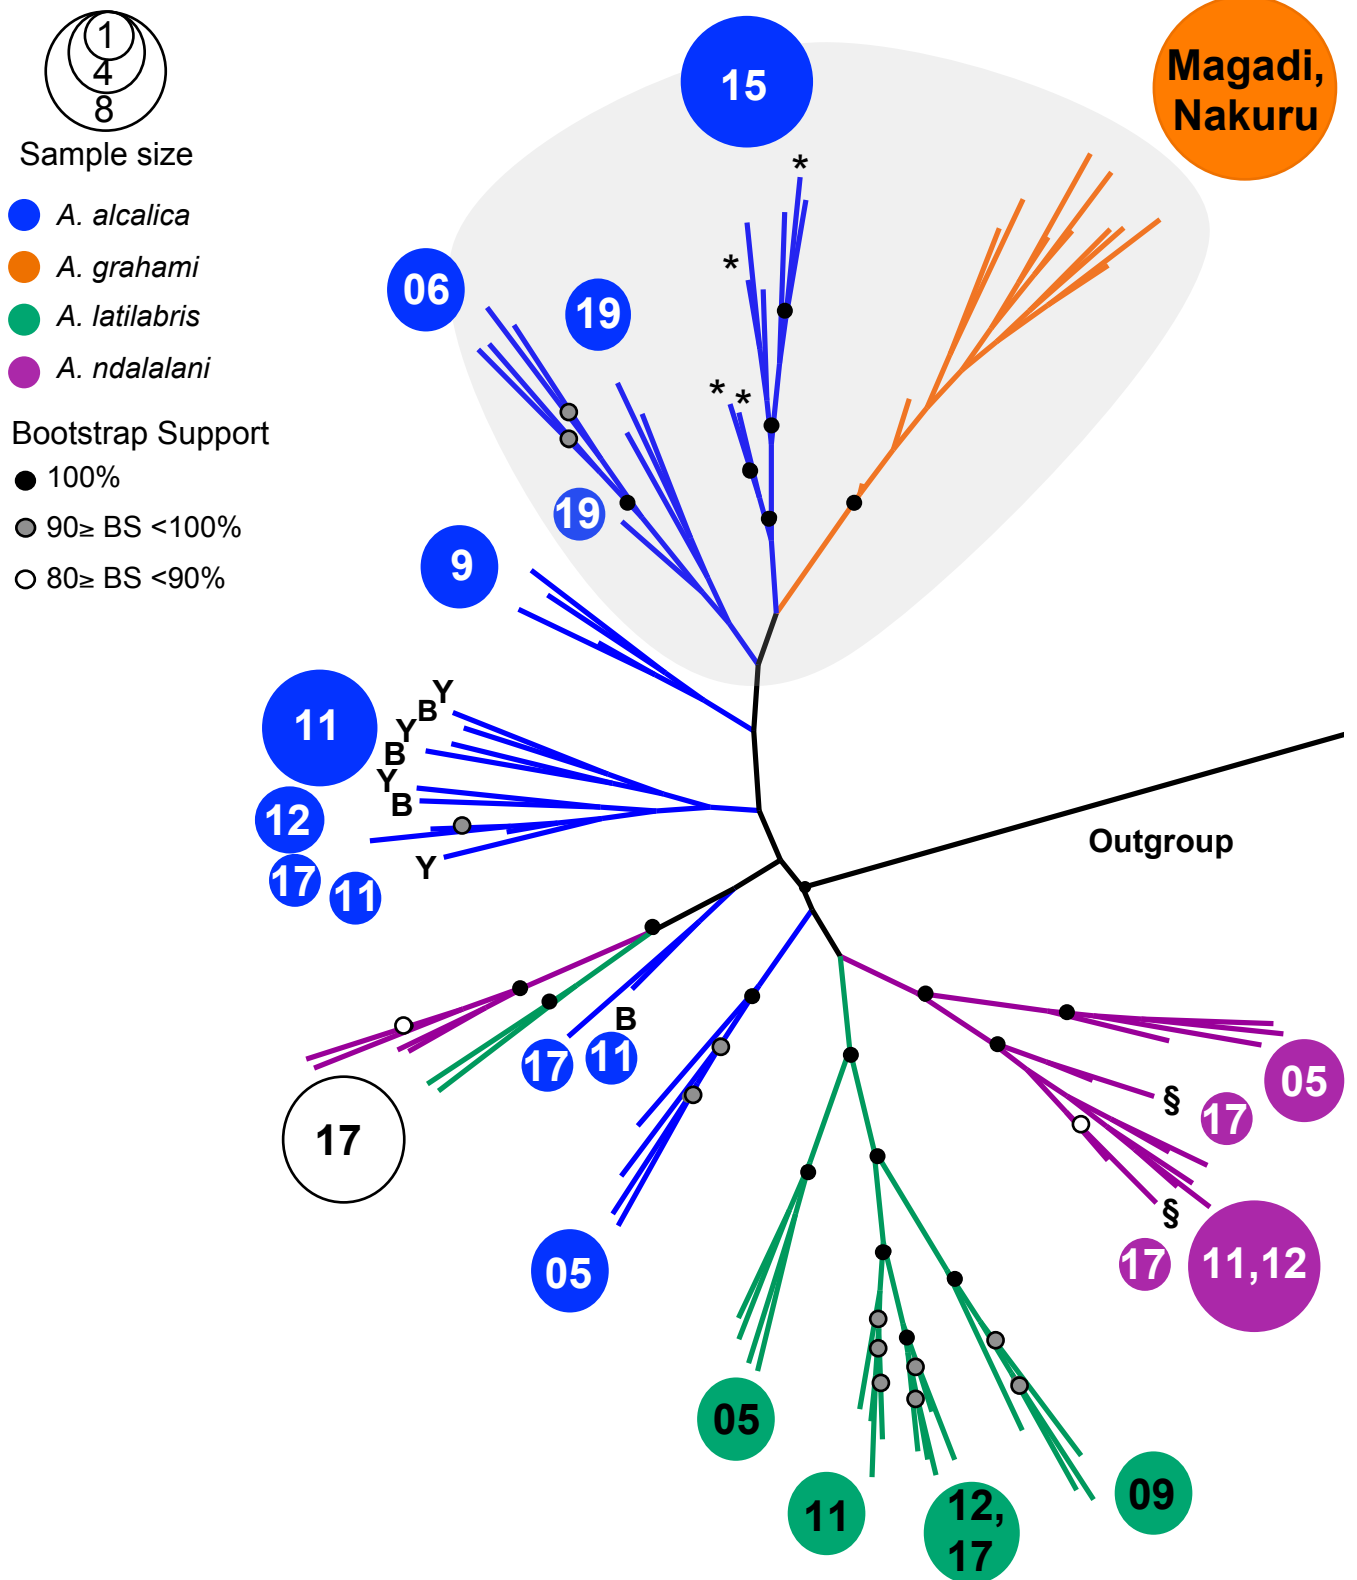

**Figure S3. ML phylogeny for variable sites using ASC\_model.**

Full taxon dataset (n=92) alignment of variable sites only with ambiguous bases removed (dataset E; 363,983 SNPs) and ascertainment bias correction (ASC\_model) applied within RAxML. The phylogeny exhibits similar topology as the phylogeny produced when the ML analysis is conducted without the \_ASC model (Figure 2C in the main paper).

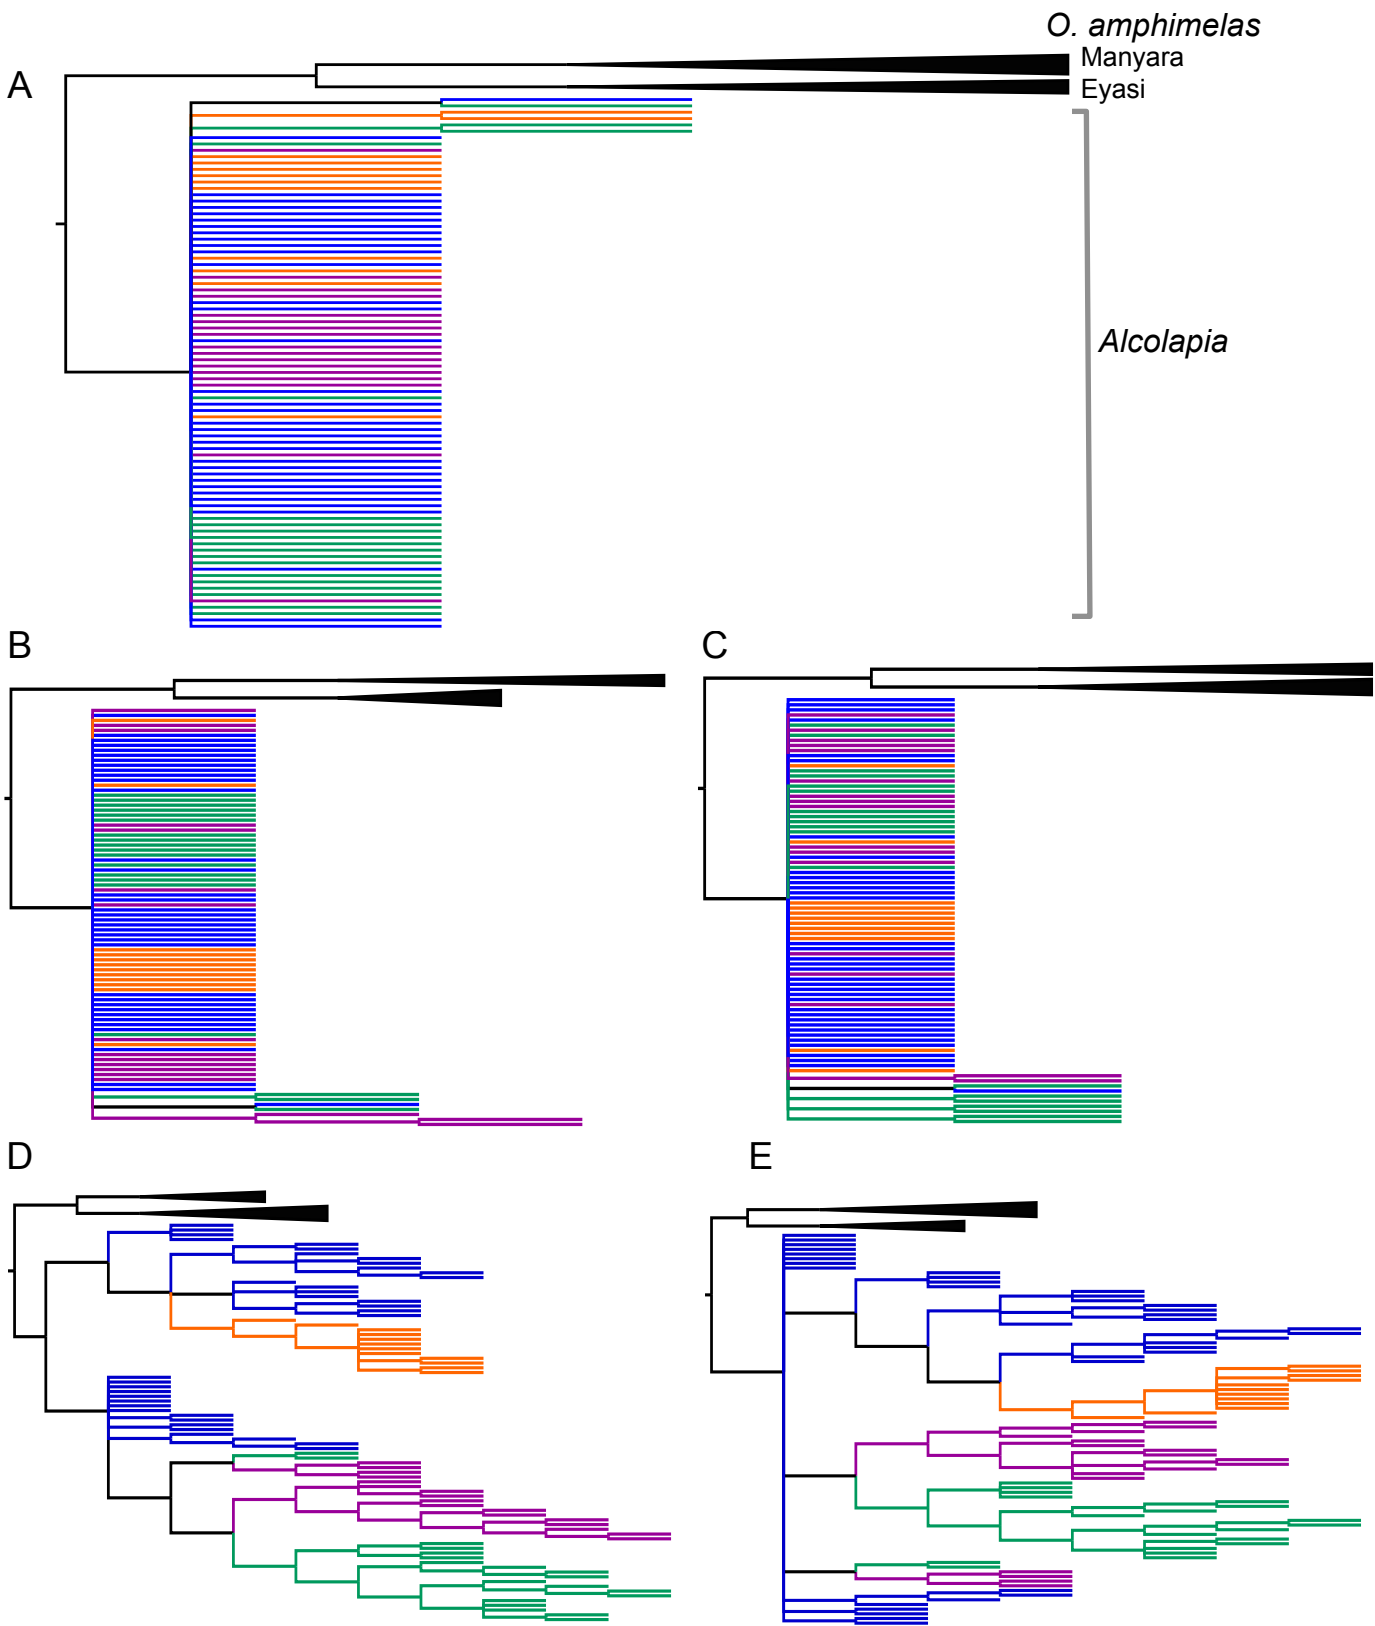

**Figure S4. Majority consensus (50%) ML phylogenies generated from additional RAD datasets.** For all analyses, trees are rooted using *O. amphimelas* as outgroup. A) de novo assembly (unmapped reads) full dataset (total alignment of 436,839 bp, including invariant sites); B, C) de novo assembly variable sites only (SNPs) dataset, B) all SNPs, without ASC\_ correction (5,832 SNPs); C) ambiguous bases removed and employing ASC\_ correction (1,898 SNPs); D, E) combined dataset of SNPs from mapped and de novo-assembled reads; D) all SNPs, without ASC\_ correction (550,748 SNPs); E) ambiguous bases removed and employing ASC\_ correction (182,909 SNPs).

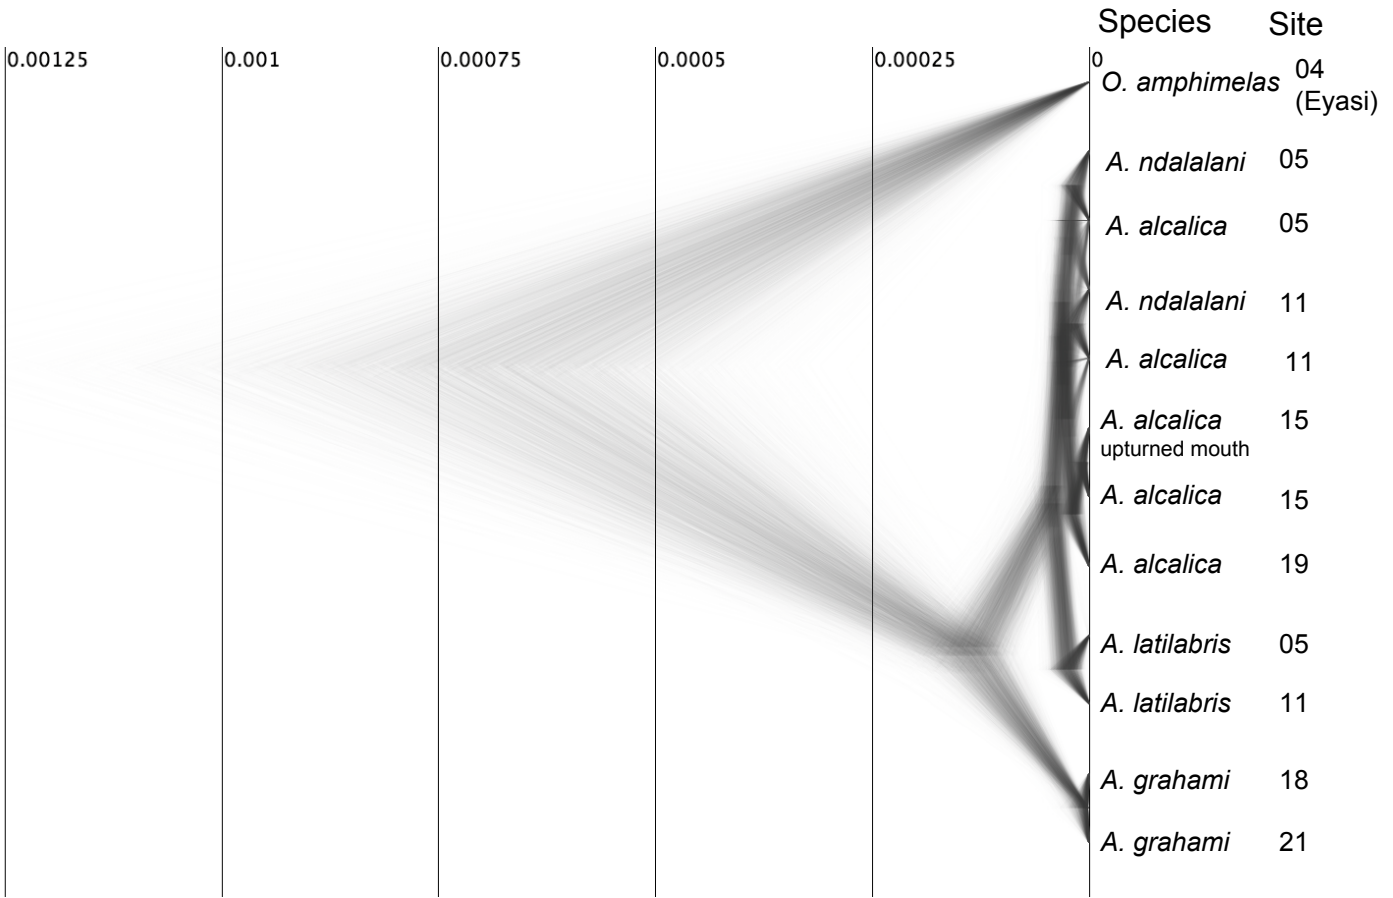

**Figure S5. Species tree generated by SNAPP analysis for selected populations.**

Analysis for a reduced-taxon dataset of 4 individuals from each of 12 populations, with unlinked biallelic SNPs (dataset F; n=48; 1,266 SNPs).

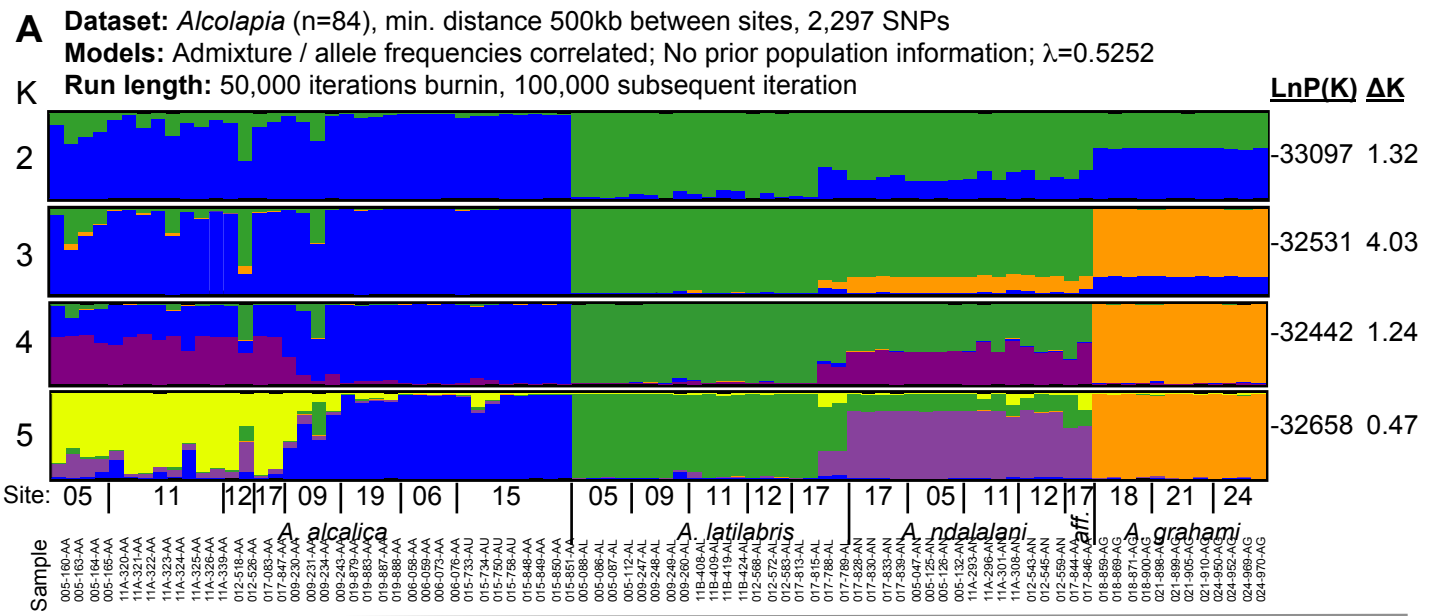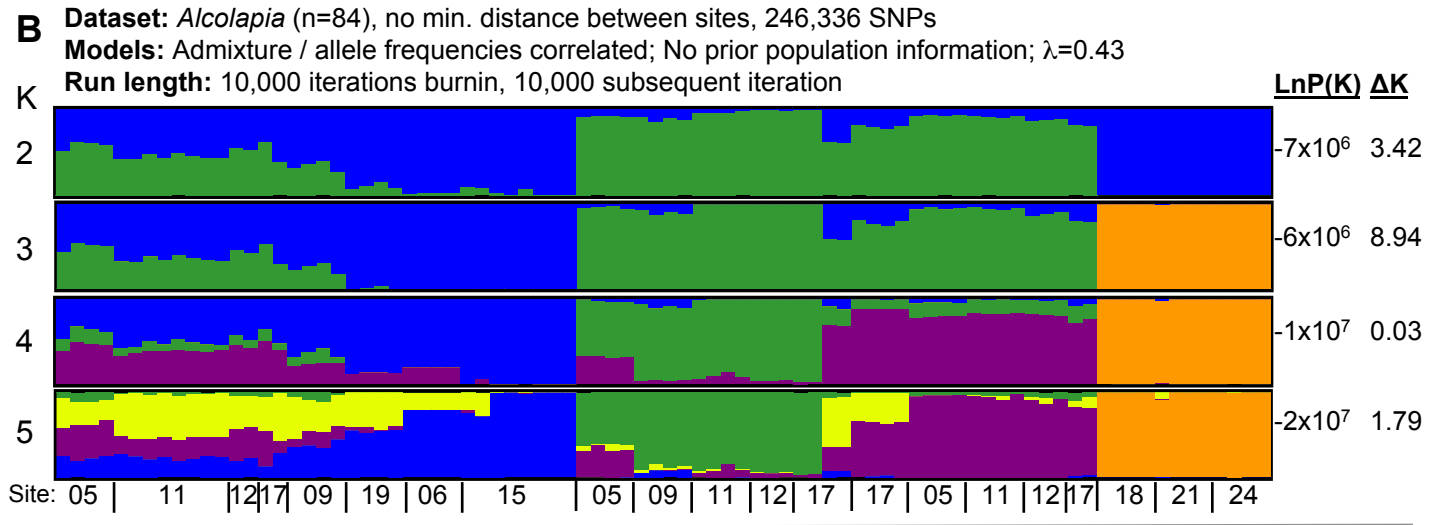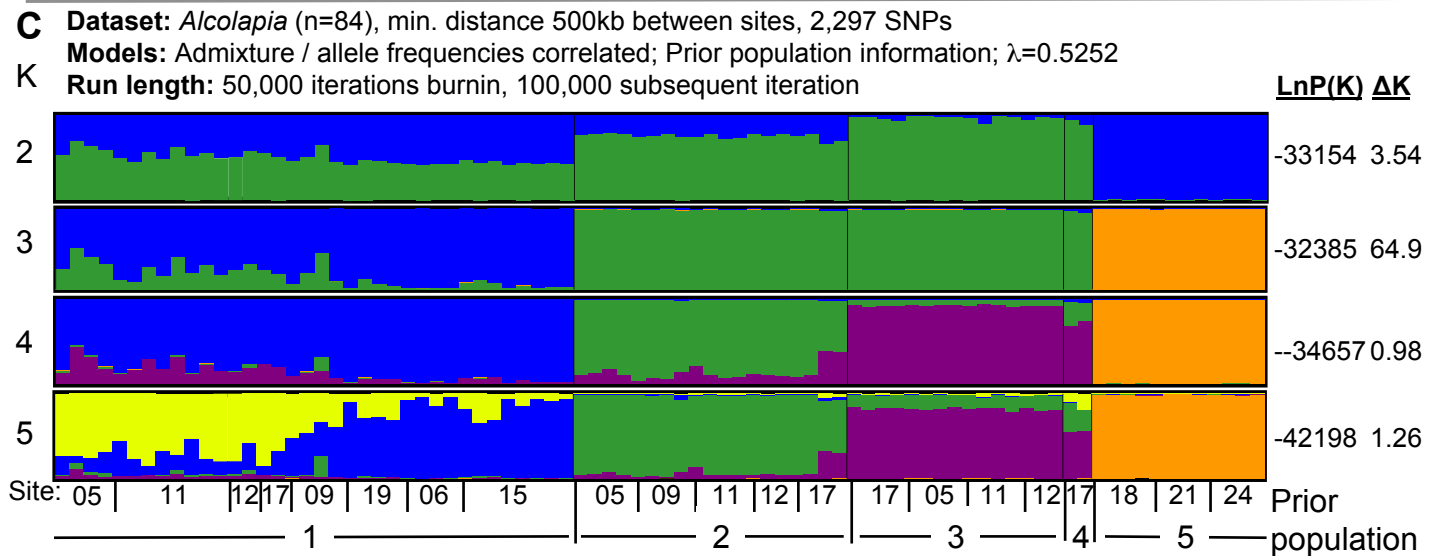

**Figure S6. Visualisation of K=2-5 for *Alcolapia* STRUCTURE analysis.** Cluster membership for admixture/correlated allele frequency models. A) Reduced dataset accounting for LD; B) Full dataset, no min. distance between SNPs; C) Population information included as a model prior. Samples are ordered as in panel A. LnP(K): Estimated Ln Prob of Data.  $\Delta K$ : second order rate of change of the likelihood function with respect to K, the modal value of which indicates the best estimate of K. 12

**A****Dataset:** Lake Natron *Alcolapia* sites 5 and 11 only (n=24), 500kb between sites, 2,227 SNPs**Models:** Admixture / allele frequencies correlated; No prior population information;  $\lambda=0.8$ **Run length:** 50,000 iterations burnin, 100,000 subsequent iterations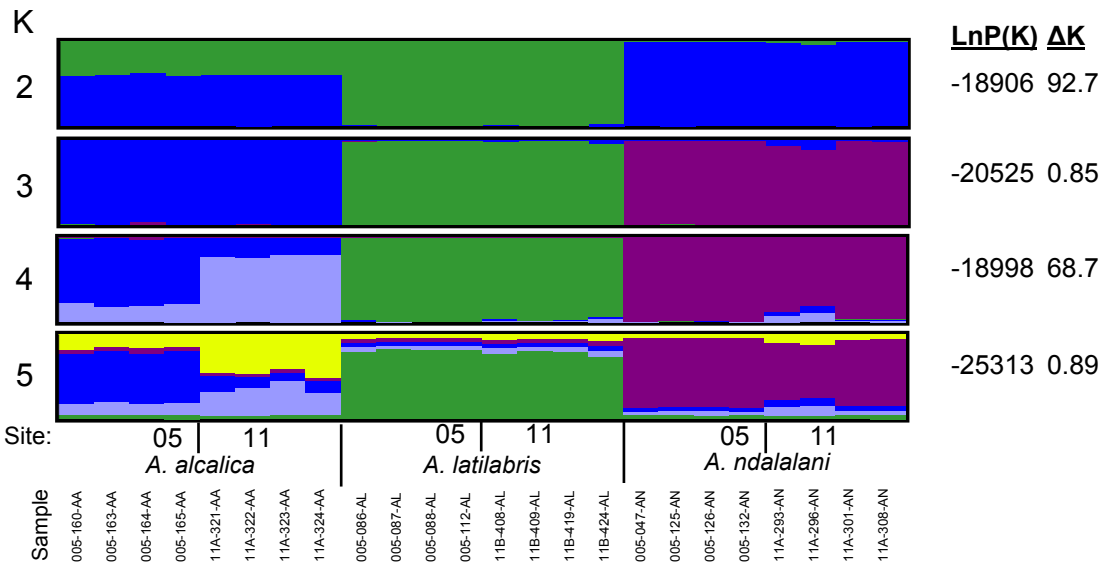**B****Dataset:** Lake Natron *Alcolapia* site 5 only (n=12), 500kb between sites, 2,180 SNPs**Models:** Admixture / allele frequencies correlated; No population information;  $\lambda=1.1$ **Run length:** 50,000 iterations burnin, 100,000 subsequent iterations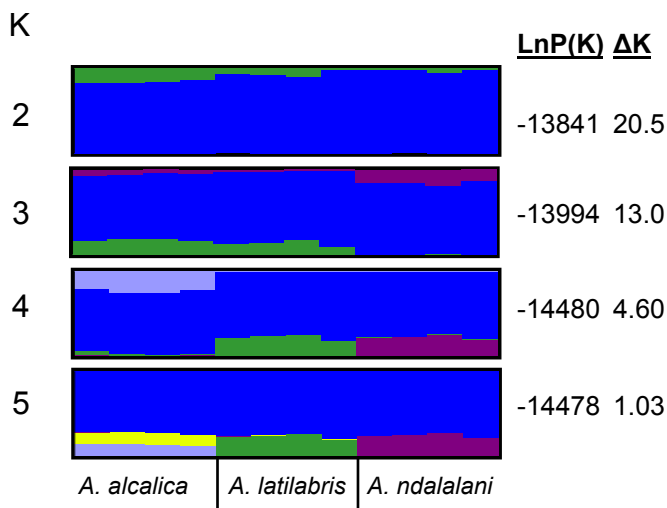**C****Dataset:** Lake Natron *Alcolapia* site 11 only (n=12), 500kb between sites, 2,160 SNPs**Models:** Admixture / allele frequencies correlated; No population information;  $\lambda=0.1.1$ **Run length:** 50,000 iterations burnin, 100,000 subsequent iterations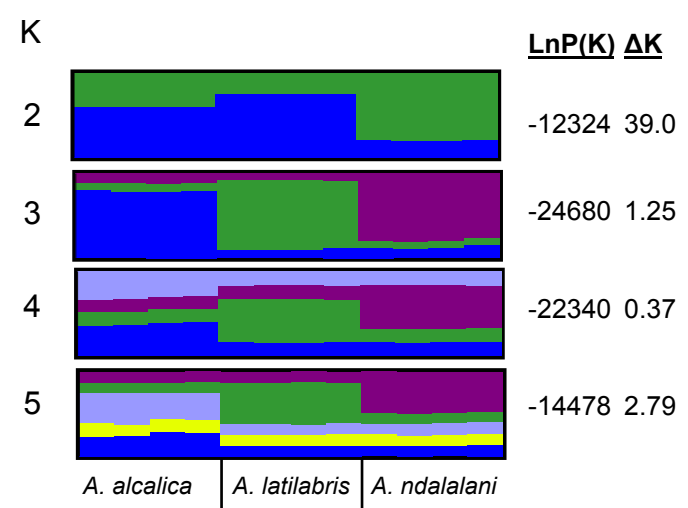**Figure S7. Visualisation of K=2-5 for *Alcolapia* STRUCTURE analysis**

Cluster membership by individual for admixture / correlated allele frequency models for sites in which all three Lake Natron species occur sympatrically: A) Sites 005 and 011 Individuals combined; B) Site 005 only; C) Site 011 only.

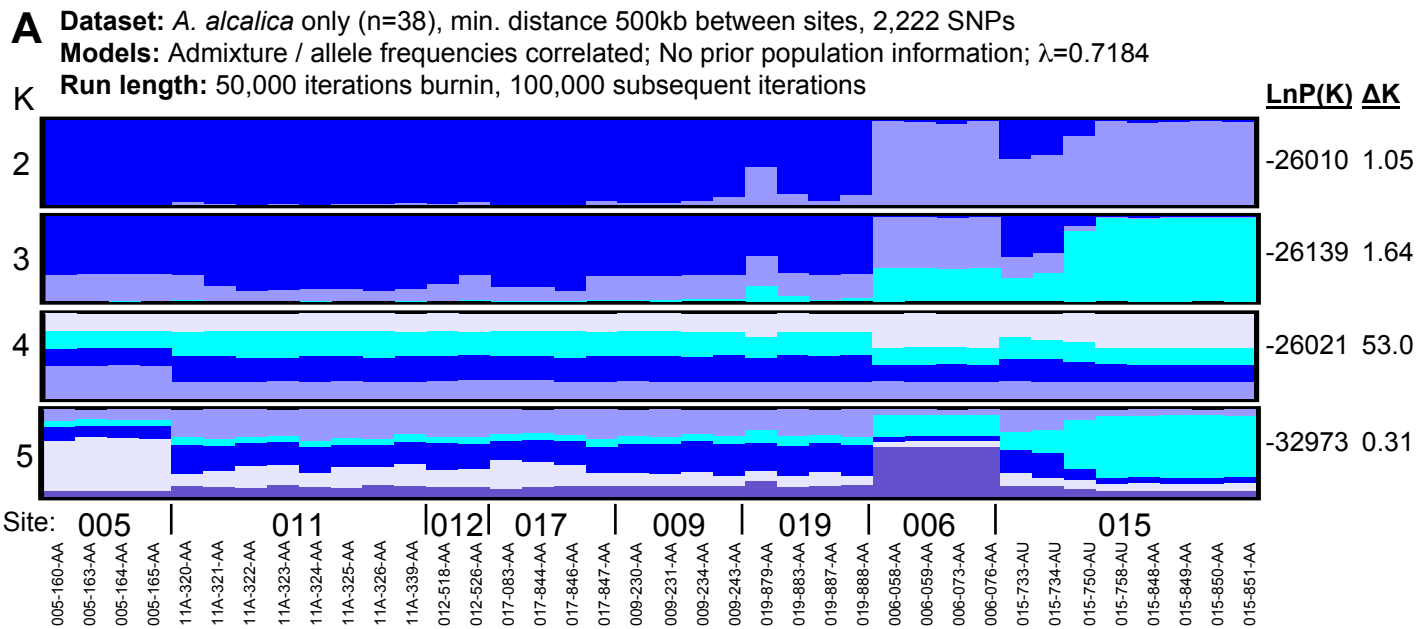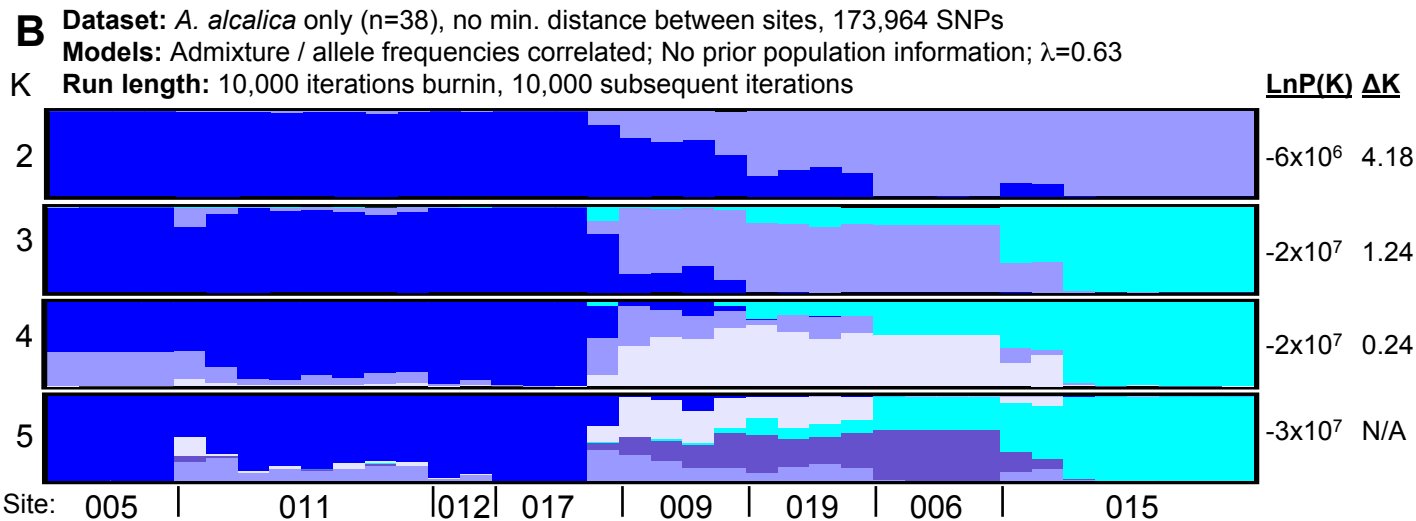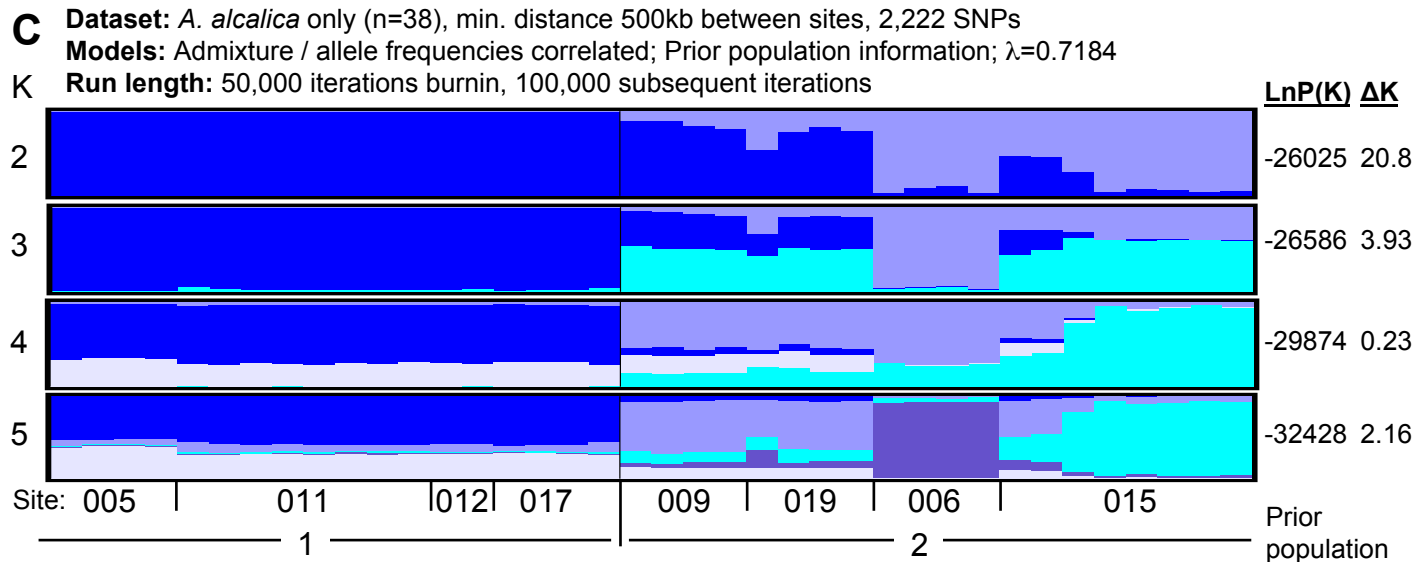

**Figure S8. Visualisation of K=2-5 for *A. alcalica* STRUCTURE analysis.** Cluster membership for admixture/ correlated allele frequency models. A) Reduced dataset accounting for LD; B) Full dataset with no min. distance between SNPs; C) Providing population information as a model prior. Samples ordered as indicated in panel A.

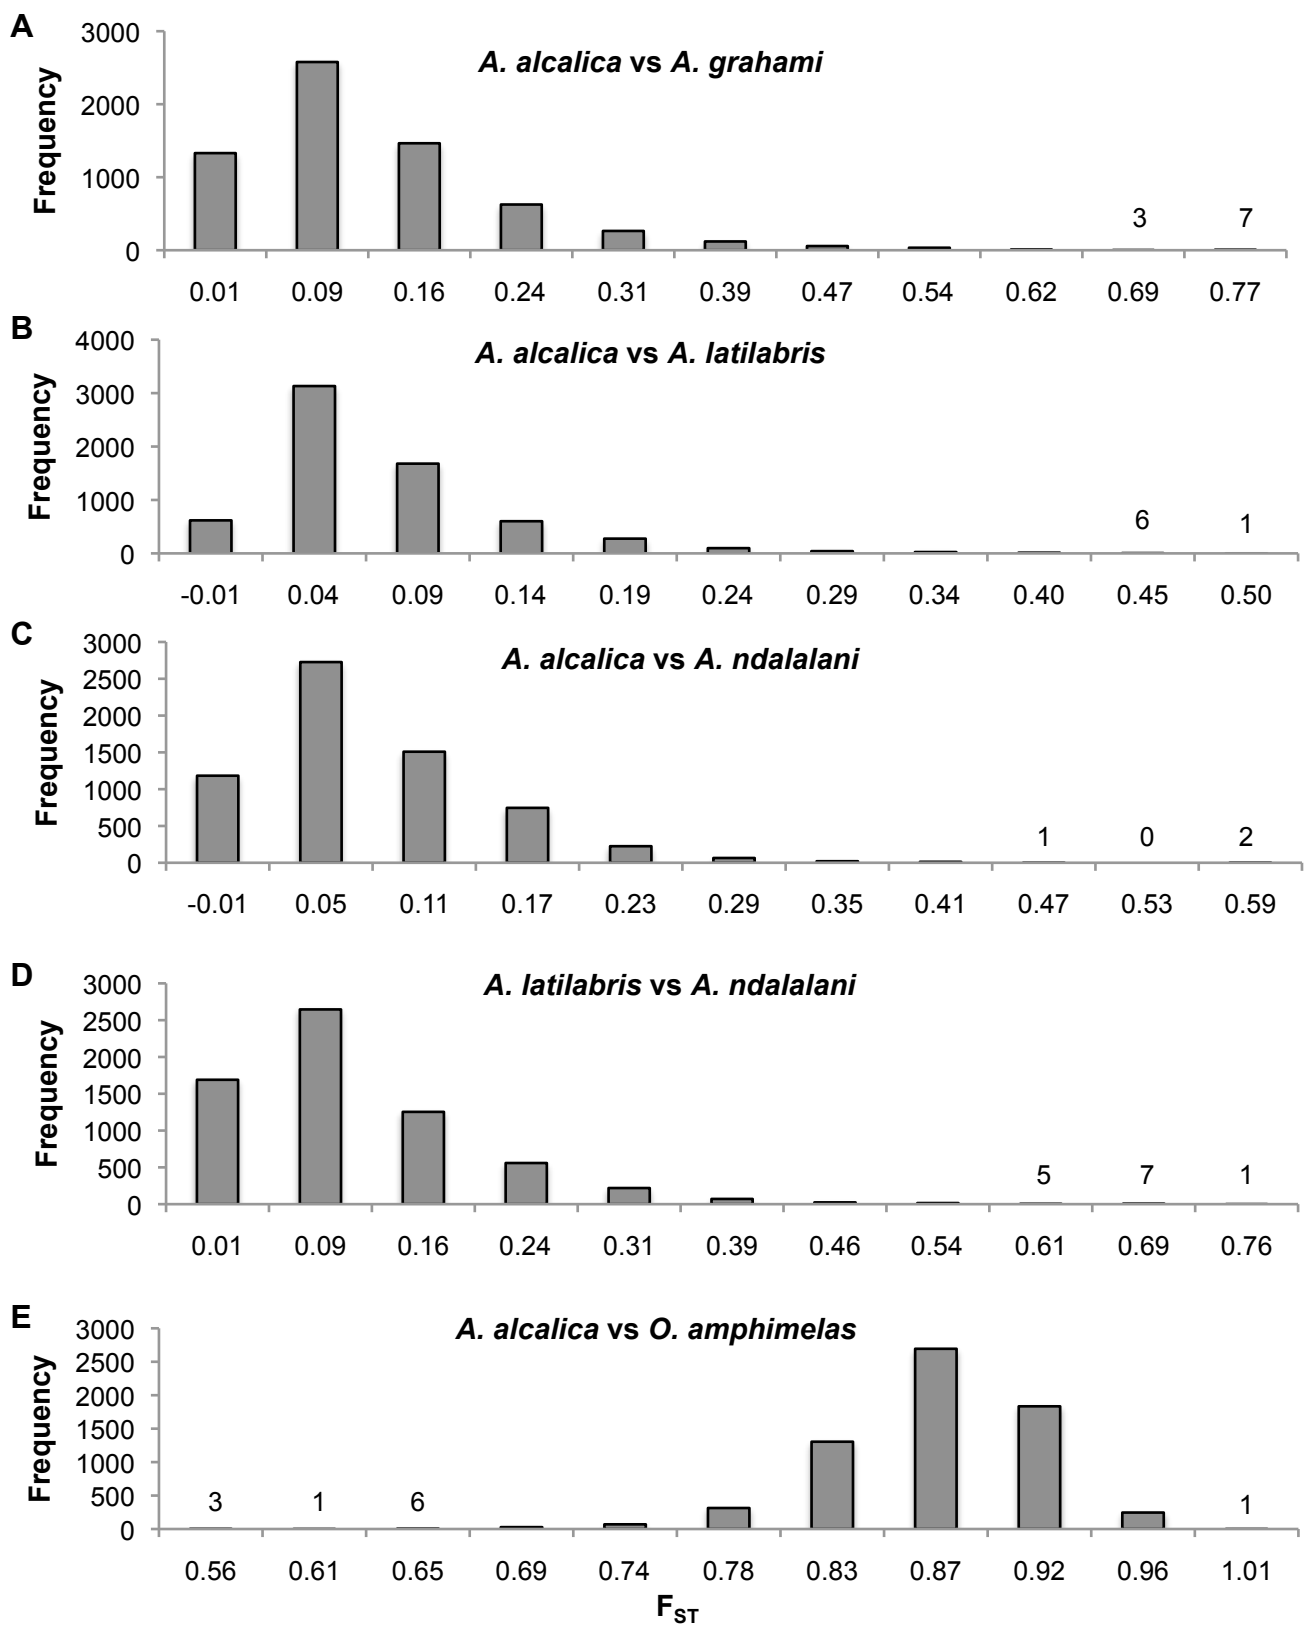

**Figure S9. Frequency histograms of sliding-window  $F_{ST}$  values for pairwise comparisons.**  $F_{ST}$  values from the analysis in Figure 4 binned in 10 equal-width bins across the range of values, with the x-axis categories being the upper limit of each bin. Frequency values  $<10$  are given in text above respective columns. All within-*Alcolapia* comparisons (A-D) show a right-skewed pattern with a majority of windows showing low differentiation, but a small number showing comparatively high  $F_{ST}$  values. Conversely, the *Alcolapia*-Outgroup comparison (E) shows a left-skewed distribution, with most comparisons showing high levels of differentiation and only a few regions of low differentiation.

*A. alcalica* vs. *A. grahami*

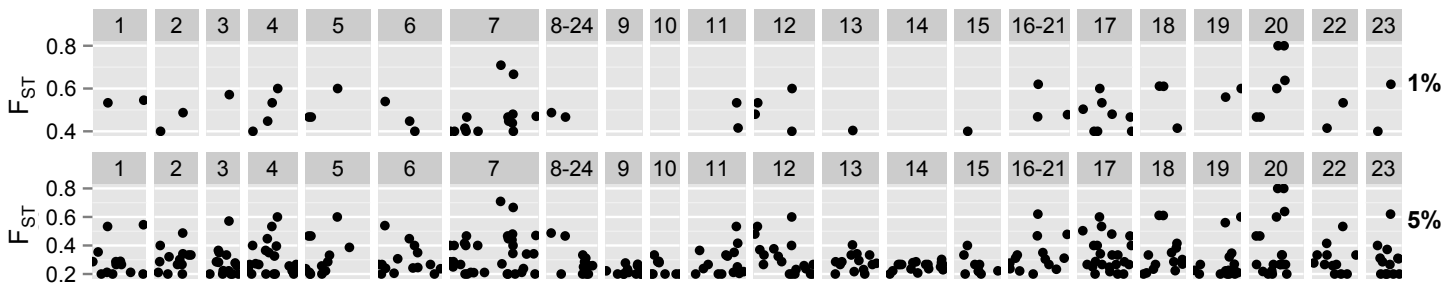

*A. alcalica* vs. *A. latilabris*

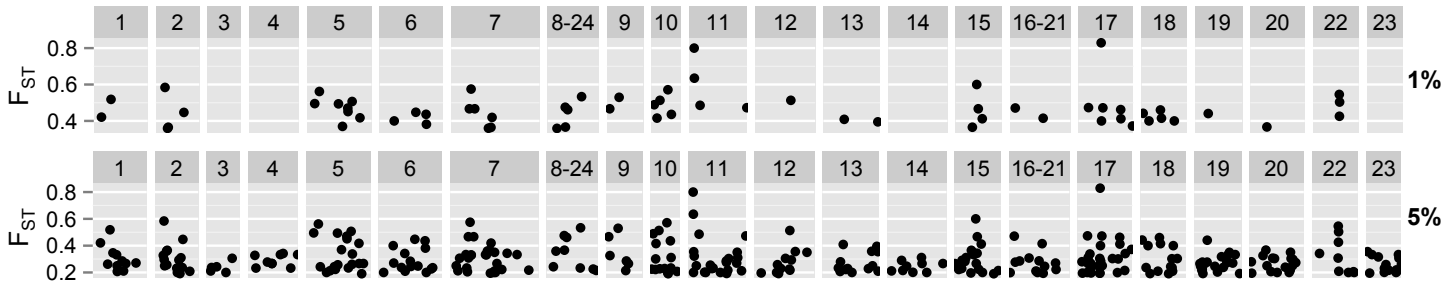

*A. alcalica* vs. *A. ndalalani*

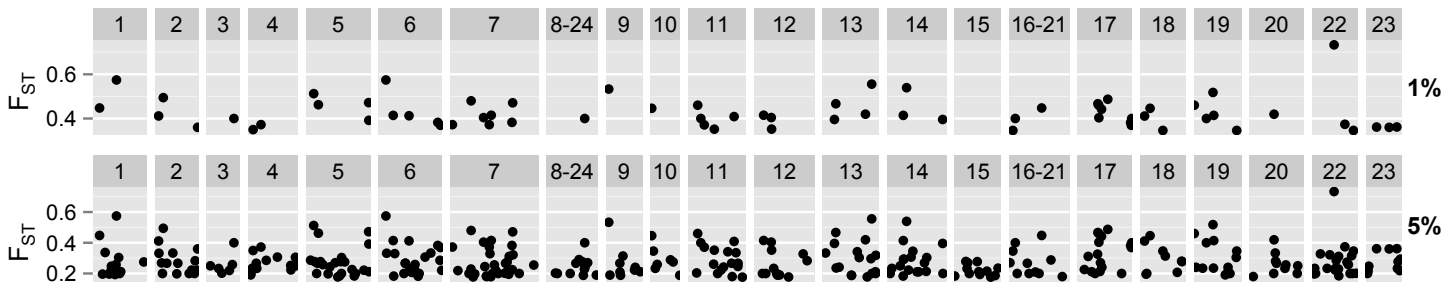

*A. latilabris* vs. *A. ndalalani*

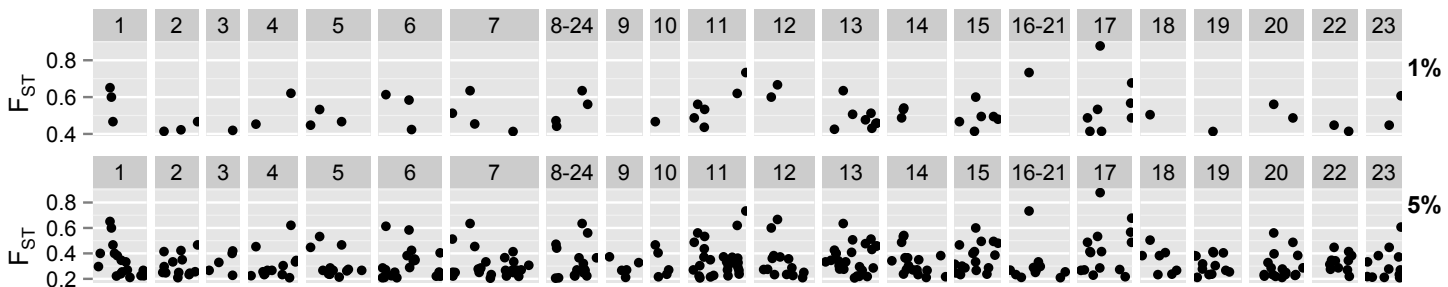

*A. alcalica* vs. *O. amphimelas*

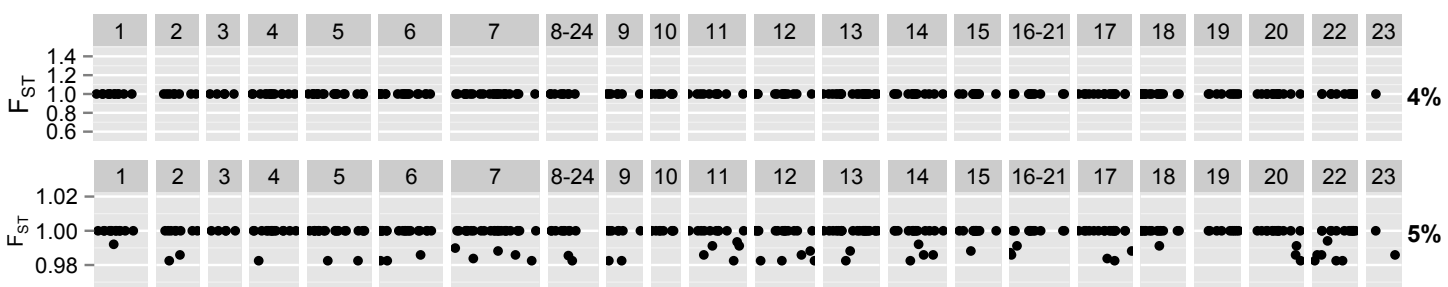

**Figure S10. Plots of the highest scoring (top 1% and 5%)  $F_{ST}$  non-overlapping windows of 100kb.**

The highest-scoring windows in the outgroup (*O. amphimelas*) comparison all exhibited maximal values ( $F_{ST}=1.00$ ), so all windows are shown at this value (equivalent to 4% of windows) rather than 1%. For the top 5% scoring windows, within-*Alcolapia* comparisons ranged from  $F_{ST}=0.2-0.8$ , while in the *O. amphimelas* comparison scores were considerably more constrained, ranging only between  $F_{ST}=0.98-1.00$ .



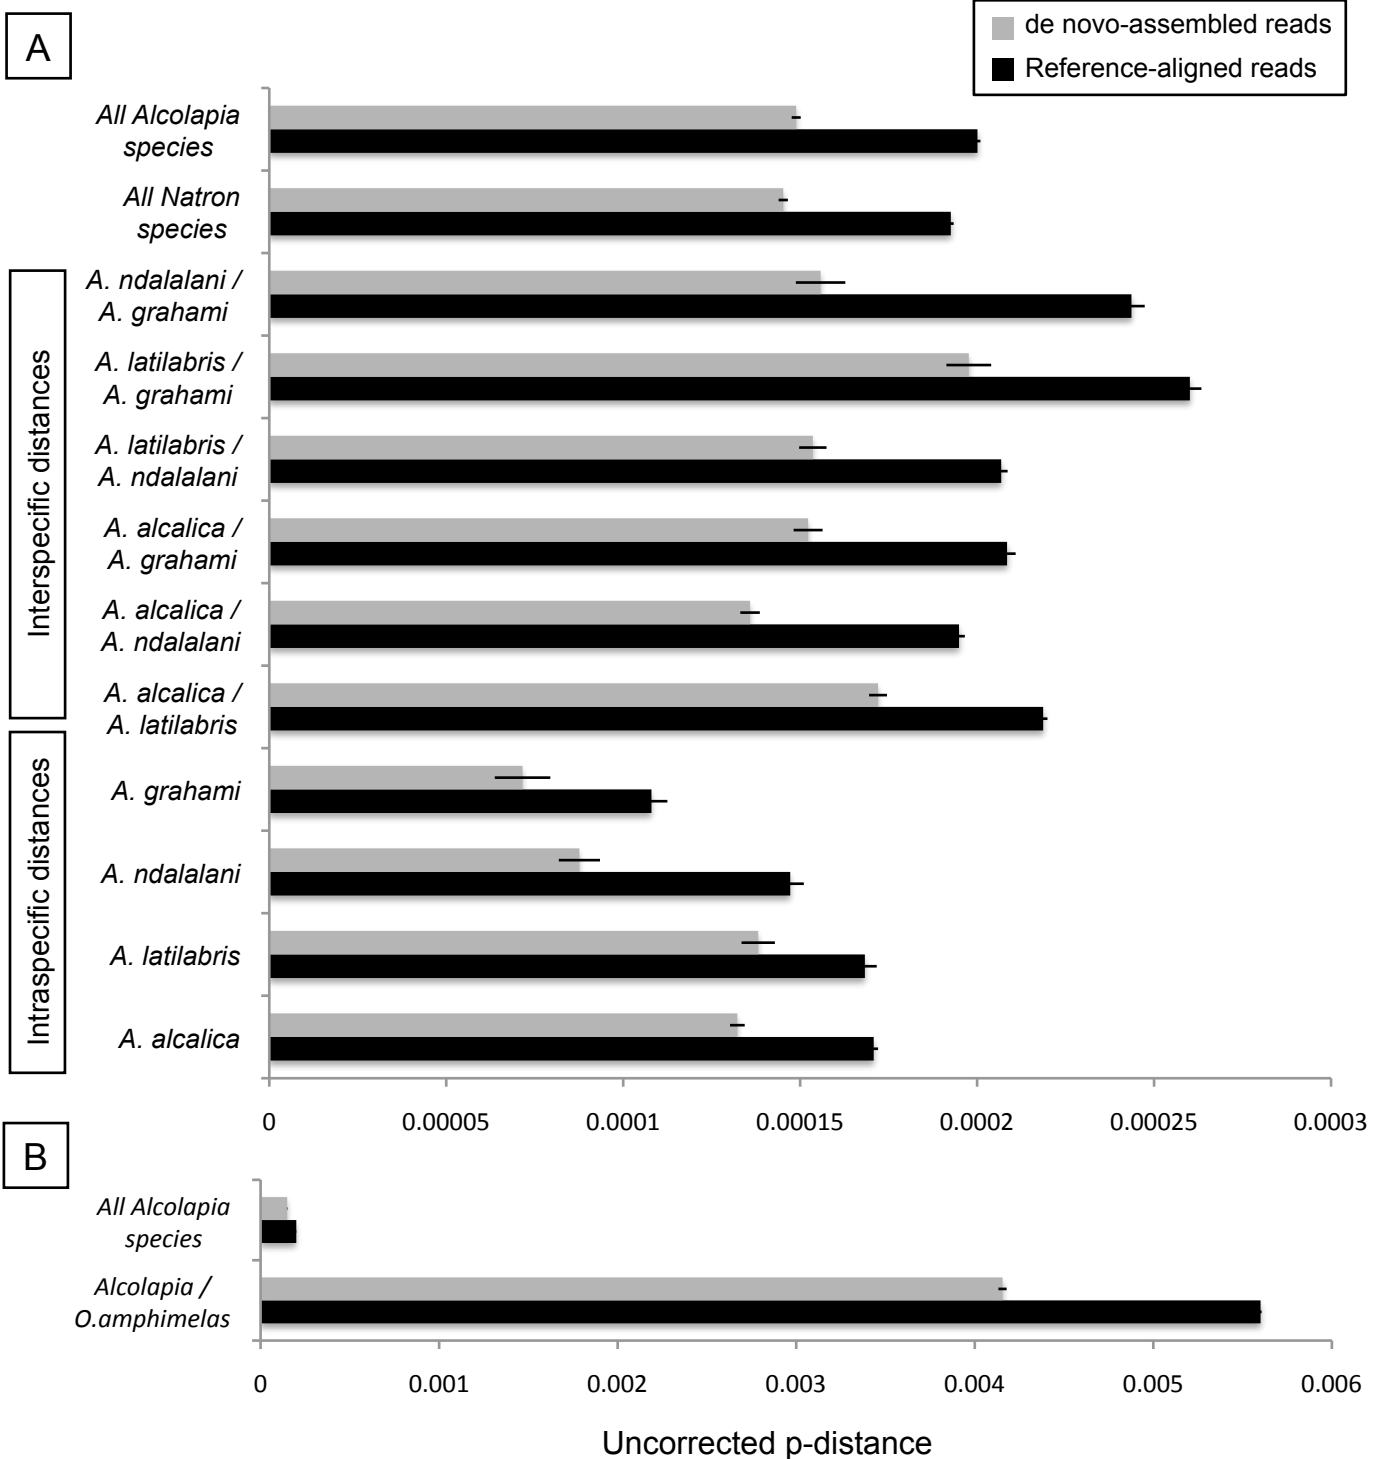

**Figure S11. Mean inter-specimen uncorrected p-distance.**

Comparison of filtered RAD data from aligned and de novo-assembled reads. A) Comparisons within *Alcolapia*. B) For comparison, the distance to the outgroup (*O. amphimelas*). Different scale axes are used for each graph (the first entry in each graph is for the same comparison, but at different scales). Error bars are +/- SEM.

**SI Tables.** All tables are also provided in editable (Excel) format, available in a separate file in the online version of this article.

**Table S1. Collection co-ordinates and sequencing statistics per sample.**

Samples in grey were excluded from downstream analyses due to poor quality and low total calls in the filtered dataset. OA: *O. amphimelas*; AA: *A. alcalica*; AB: *A. alcalica* blue morph; AY: *A. alcalica* yellow morph; AU: *A. alcalica* upturned-mouth morph; AL: *A. latilabris*; AN: *A. ndalalani*; AG: *A. grahami*.

|                      | Sample ID  | Accession reference ID  | Sampling GPS coordinates | Sequenced reads (n) | Duplicates (n) | Duplicates (%) | Mapped (%) | Paired (%) | Total calls (n) | QC-filtered calls (n) | QC-filtered calls (%) | Mean mapping rate |
|----------------------|------------|-------------------------|--------------------------|---------------------|----------------|----------------|------------|------------|-----------------|-----------------------|-----------------------|-------------------|
| <i>O. amphimelas</i> | 002-001-OA | ERS652626               | S -3.423333 E 35.851806  | 1357822             | 365705         | 26.93          | 89.73      | 81.15      | 19225625        | N/A                   | N/A                   | 89.85             |
|                      | 002-003-OA | ERS652628               | S -3.423333 E 35.851806  | 3760790             | 1122956        | 29.86          | 89.67      | 80.88      | 27501927        | 12351820              | 44.91                 |                   |
|                      | 002-004-OA | ERS652623               | S -3.423333 E 35.851806  | 8688110             | 3077792        | 35.43          | 89.73      | 80.78      | 32790200        | 18166870              | 55.40                 |                   |
|                      | 002-005-OA | ERS652624               | S -3.423333 E 35.851806  | 5593242             | 1797032        | 32.13          | 89.72      | 80.95      | 28857245        | 15351777              | 53.20                 |                   |
|                      | 004-029-OA | ERS652650               | S -3.425306 E 35.343723  | 8499968             | 2816835        | 33.14          | 89.85      | 80.55      | 34897625        | 18049330              | 51.72                 |                   |
|                      | 004-030-OA | ERS652670               | S -3.425306 E 35.343723  | 4614448             | 1828295        | 39.62          | 89.85      | 81.38      | 25410823        | 12624979              | 49.68                 |                   |
|                      | 004-032-OA | ERS652669               | S -3.425306 E 35.343723  | 6429908             | 2044339        | 31.79          | 90.12      | 81.22      | 29516848        | 16229295              | 54.98                 |                   |
| 004-035-OA           | ERS652671  | S -3.425306 E 35.343723 | 6050738                  | 1933421             | 31.95          | 90.16          | 81.46      | 30160099   | 16031277        | 53.15                 |                       |                   |
| <i>A. alcalica</i>   | 005-160-AA | ERS652662               | S -2.597583 E 35.918417  | 7962738             | 3157400        | 39.65          | 89.47      | 78.23      | 28647369        | 16339639              | 57.04                 | 88.79             |
|                      | 005-163-AA | ERS652663               | S -2.597583 E 35.918417  | 12639506            | 5344313        | 42.28          | 89.40      | 78.24      | 31790644        | 19339959              | 60.84                 |                   |
|                      | 005-164-AA | ERS652709               | S -2.597583 E 35.918417  | 7767920             | 3151245        | 40.57          | 89.54      | 78.38      | 28511977        | 16007180              | 56.14                 |                   |
|                      | 005-165-AA | ERS652665               | S -2.597583 E 35.918417  | 6919164             | 2706673        | 39.12          | 89.42      | 78.62      | 28611615        | 15460588              | 54.04                 |                   |
|                      | 006-058-AA | ERS652659               | S -2.430397 E 35.895392  | 9480270             | 3404504        | 35.91          | 89.87      | 79.22      | 29482851        | 18084493              | 61.34                 |                   |
|                      | 006-059-AA | ERS652658               | S -2.430397 E 35.895392  | 8037504             | 2801660        | 34.86          | 89.62      | 78.93      | 29306108        | 17263844              | 58.91                 |                   |
|                      | 006-073-AA | ERS652686               | S -2.430397 E 35.895392  | 7386516             | 2595984        | 35.14          | 89.77      | 78.90      | 29135230        | 16782296              | 57.60                 |                   |
|                      | 006-076-AA | ERS652684               | S -2.430397 E 35.895392  | 8719750             | 3142721        | 36.04          | 89.75      | 78.87      | 29901941        | 17808281              | 59.56                 |                   |
|                      | 009-230-AA | ERS652618               | S -2.471278 E 35.887889  | 1627594             | 572245         | 35.16          | 89.42      | 78.94      | 19084112        | 4587454               | 24.04                 |                   |
|                      | 009-231-AA | ERS652619               | S -2.471278 E 35.887889  | 4312168             | 1629393        | 37.79          | 89.45      | 78.84      | 25365205        | 11775955              | 46.43                 |                   |
|                      | 009-234-AA | ERS652617               | S -2.471278 E 35.887889  | 10127960            | 4226515        | 41.73          | 89.31      | 78.18      | 31697682        | 17881771              | 56.41                 |                   |
|                      | 009-243-AA | ERS652625               | S -2.471278 E 35.887889  | 9616338             | 3959289        | 41.17          | 89.20      | 78.21      | 29774635        | 17480225              | 58.71                 |                   |
|                      | 11A-320-AB | ERS652657               | S -2.591000 E 36.009445  | 2475984             | 970742         | 39.21          | 89.87      | 79.55      | 21348756        | 7033004               | 32.94                 |                   |
|                      | 11A-321-AB | ERS652656               | S -2.591000 E 36.009445  | 6274036             | 2630185        | 41.92          | 89.74      | 79.41      | 26350715        | 14488129              | 54.98                 |                   |
|                      | 11A-322-AB | ERS652655               | S -2.591000 E 36.009445  | 9687160             | 4304246        | 44.43          | 89.77      | 79.23      | 28644508        | 17112417              | 59.74                 |                   |
|                      | 11A-323-AY | ERS652654               | S -2.591000 E 36.009445  | 11694544            | 5231031        | 44.73          | 89.82      | 79.34      | 29542463        | 18514362              | 62.67                 |                   |
|                      | 11A-324-AY | ERS652653               | S -2.591000 E 36.009445  | 8685264             | 3844753        | 44.27          | 89.82      | 79.44      | 27323911        | 16633029              | 60.87                 |                   |
|                      | 11A-325-AY | ERS652652               | S -2.591000 E 36.009445  | 9991060             | 4298967        | 43.03          | 89.57      | 78.88      | 27581617        | 17649780              | 63.99                 |                   |
|                      | 11A-326-AY | ERS652651               | S -2.591000 E 36.009445  | 10447384            | 4549111        | 43.54          | 89.61      | 79.07      | 28316443        | 17775105              | 62.77                 |                   |
|                      | 11A-339-AB | ERS652672               | S -2.591000 E 36.009445  | 10093142            | 4534603        | 44.93          | 89.74      | 79.02      | 27169435        | 17340274              | 63.82                 |                   |
| 012-517-AA           | ERS652673  | S -2.618972 E 35.999806 | 2150132                  | 1409805             | 65.57          | 87.53          | 75.95      | 14321762   | 1203496         | 8.40                  |                       |                   |
| 012-518-AA           | ERS652674  | S -2.618972 E 35.999806 | 9564398                  | 6392842             | 66.84          | 87.09          | 75.22      | 26391555   | 8397909         | 31.82                 |                       |                   |
| 012-521-AA           | ERS652638  | S -2.618972 E 35.999806 | 1193110                  | 772867              | 64.78          | 86.67          | 75.71      | 9998081    | 313244          | 3.13                  |                       |                   |
| 012-526-AA           | ERS652641  | S -2.618972 E 35.999806 | 4300436                  | 2864522             | 66.61          | 87.42          | 75.84      | 19390154   | 3343132         | 17.24                 |                       |                   |

|                      | Sample ID  | Accession reference ID  | Sampling GPS coordinates | Sequenced reads (n) | Duplicates (n) | Duplicates (%) | Mapped (%) | Paired (%) | Total calls (n) | QC-filtered calls (n) | QC-filtered calls (%) | Mean mapping rate |
|----------------------|------------|-------------------------|--------------------------|---------------------|----------------|----------------|------------|------------|-----------------|-----------------------|-----------------------|-------------------|
| <i>A. alcalica</i>   | 015-733-AU | ERS652635               | S -2.433361 E 36.10175   | 6589102             | 4432160        | 67.27          | 87.55      | 76.23      | 23136938        | 5559416               | 24.03                 | 88.79             |
|                      | 015-734-AU | ERS652700               | S -2.433361 E 36.10175   | 24249950            | 15684157       | 64.68          | 84.99      | 72.88      | 34712858        | 19067432              | 54.93                 |                   |
|                      | 015-750-AU | ERS652664               | S -2.433361 E 36.10175   | 5625700             | 3608042        | 64.13          | 86.92      | 75.56      | 22447628        | 5440646               | 24.24                 |                   |
|                      | 015-758-AU | ERS652642               | S -2.433361 E 36.10175   | 12987418            | 7517598        | 57.88          | 89.26      | 78.61      | 28077266        | 16124699              | 57.43                 |                   |
|                      | 015-848-AA | ERS652630               | S -2.433361 E 36.10175   | 8412214             | 4502353        | 53.52          | 88.83      | 78.30      | 26656841        | 16556078              | 62.11                 |                   |
|                      | 015-849-AA | ERS652631               | S -2.433361 E 36.10175   | 7886154             | 4430135        | 56.18          | 88.95      | 78.50      | 25690733        | 16016409              | 62.34                 |                   |
|                      | 015-850-AA | ERS652644               | S -2.433361 E 36.10175   | 6311730             | 3354039        | 53.14          | 88.88      | 78.46      | 24020411        | 14792394              | 61.58                 |                   |
|                      | 015-851-AA | ERS652643               | S -2.433361 E 36.10175   | 9803922             | 5116278        | 52.19          | 88.62      | 77.64      | 26692651        | 15371665              | 57.59                 |                   |
|                      | 017-083-AA | ERS652697               | S -2.456278 E 36.087806  | 7439702             | 2553925        | 34.33          | 89.64      | 78.43      | 29072971        | 13810736              | 47.50                 |                   |
|                      | 017-844-AA | ERS652634               | S -2.456278 E 36.087806  | 12395920            | 7039379        | 56.79          | 89.05      | 78.41      | 28085487        | 12560157              | 44.72                 |                   |
|                      | 017-846-AA | ERS652632               | S -2.456278 E 36.087806  | 10438592            | 5865487        | 56.19          | 89.20      | 78.48      | 27009981        | 11431905              | 42.32                 |                   |
|                      | 017-847-AA | ERS652633               | S -2.456278 E 36.087806  | 11246308            | 6332246        | 56.31          | 89.10      | 78.40      | 27327923        | 15068717              | 55.14                 |                   |
|                      | 019-879-AA | ERS652680               | S -2.145833 E 36.05575   | 27008098            | 17754321       | 65.74          | 87.20      | 76.41      | 31615471        | 18962739              | 59.98                 |                   |
|                      | 019-883-AA | ERS652701               | S -2.145833 E 36.05575   | 11096528            | 7197186        | 64.86          | 87.86      | 76.91      | 24736152        | 12254593              | 49.54                 |                   |
|                      | 019-887-AA | ERS652702               | S -2.145833 E 36.05575   | 4305954             | 2473368        | 57.44          | 88.30      | 77.71      | 21038958        | 7229892               | 34.36                 |                   |
| 019-888-AA           | ERS652703  | S -2.145833 E 36.05575  | 8926152                  | 5281875             | 59.17          | 86.54          | 75.89      | 25180896   | 12213631        | 48.50                 |                       |                   |
| <i>A. latilabris</i> | 005-086-AL | ERS652705               | S -2.597583 E 35.918417  | 5299794             | 1723022        | 32.51          | 89.72      | 78.99      | 26629605        | 14388660              | 54.03                 | 88.74             |
|                      | 005-087-AL | ERS652704               | S -2.597583 E 35.918417  | 7195264             | 2417648        | 33.60          | 89.59      | 78.77      | 28951967        | 16735599              | 57.80                 |                   |
|                      | 005-088-AL | ERS652706               | S -2.597583 E 35.918417  | 9458188             | 3352199        | 35.44          | 89.58      | 78.76      | 29921568        | 18547005              | 61.99                 |                   |
|                      | 005-112-AL | ERS652647               | S -2.597583 E 35.918417  | 4150534             | 1552605        | 37.41          | 89.32      | 78.49      | 24748665        | 11398690              | 46.06                 |                   |
|                      | 009-247-AL | ERS652627               | S -2.471278 E 35.887889  | 11118486            | 4640657        | 41.74          | 89.54      | 78.28      | 31325719        | 18615031              | 59.42                 |                   |
|                      | 009-248-AL | ERS652621               | S -2.471278 E 35.887889  | 12354302            | 5261344        | 42.59          | 89.57      | 78.42      | 31524470        | 19376823              | 61.47                 |                   |
|                      | 009-249-AL | ERS652620               | S -2.471278 E 35.887889  | 8642950             | 3539857        | 40.96          | 89.59      | 78.48      | 29261691        | 16895633              | 57.74                 |                   |
|                      | 009-260-AL | ERS652694               | S -2.471278 E 35.887889  | 8318970             | 3321266        | 39.92          | 89.51      | 78.68      | 29051678        | 16707856              | 57.51                 |                   |
|                      | 11B-408-AL | ERS652668               | S -2.591667 E 36.012056  | 4279346             | 1763096        | 41.20          | 89.84      | 79.39      | 23323430        | 11318570              | 48.53                 |                   |
|                      | 11B-409-AL | ERS652667               | S -2.591667 E 36.012056  | 8910514             | 3846933        | 43.17          | 89.76      | 78.92      | 26603729        | 16650052              | 62.59                 |                   |
|                      | 11B-419-AL | ERS652679               | S -2.591667 E 36.012056  | 4204078             | 1722750        | 40.98          | 89.88      | 79.63      | 23804721        | 11273496              | 47.36                 |                   |
|                      | 11B-424-AL | ERS652689               | S -2.591667 E 36.012056  | 4836192             | 3148127        | 65.10          | 86.67      | 75.34      | 21110867        | 4204765               | 19.92                 |                   |
|                      | 012-567-AL | ERS652681               | S -2.618972 E 35.999806  | 1479758             | 947123         | 64.01          | 85.34      | 74.07      | 11342001        | 487321                | 4.30                  |                   |
|                      | 012-568-AL | ERS652685               | S -2.618972 E 35.999806  | 11460052            | 7544751        | 65.84          | 87.39      | 75.79      | 28122043        | 11200347              | 39.83                 |                   |
|                      | 012-572-AL | ERS652695               | S -2.618972 E 35.999806  | 5437930             | 3517713        | 64.69          | 86.63      | 75.16      | 22682601        | 4851003               | 21.39                 |                   |
|                      | 012-583-AL | ERS652649               | S -2.618972 E 35.999806  | 6071594             | 4054002        | 66.77          | 87.14      | 75.69      | 22961856        | 4980778               | 21.69                 |                   |
|                      | 017-788-AL | ERS652640               | S -2.456278 E 36.087806  | 20111250            | 11830129       | 58.82          | 89.05      | 78.20      | 30313472        | 19209844              | 63.37                 |                   |
|                      | 017-789-AL | ERS652639               | S -2.456278 E 36.087806  | 17481210            | 10205842       | 58.38          | 89.15      | 78.40      | 29486809        | 18331005              | 62.17                 |                   |
| 017-813-AL           | ERS652688  | S -2.456278 E 36.087806 | 11007076                 | 6154940             | 55.92          | 88.95          | 78.27      | 28032672   | 15308624        | 54.61                 |                       |                   |
| 017-815-AL           | ERS652687  | S -2.456278 E 36.087806 | 6506730                  | 3397642             | 52.22          | 88.59          | 77.86      | 25160380   | 11882911        | 47.23                 |                       |                   |

|                     | Sample ID     | Accession reference ID  | Sampling GPS coordinates | Sequenced reads (n) | Duplicates (n) | Duplicates (%) | Mapped (%) | Paired (%) | Total calls (n) | QC-filtered calls (n) | QC-filtered calls (%) | Mean mapping rate |
|---------------------|---------------|-------------------------|--------------------------|---------------------|----------------|----------------|------------|------------|-----------------|-----------------------|-----------------------|-------------------|
| <i>A. ndalalani</i> | 005-047-AN    | ERS652660               | S -2.597583 E 35.918417  | 3370746             | 1030405        | 30.57          | 89.68      | 78.90      | 24549929        | 10930759              | 44.52                 | 88.75             |
|                     | 005-125-AN    | ERS652710               | S -2.597583 E 35.918417  | 9426726             | 3863169        | 40.98          | 89.21      | 77.95      | 29691805        | 17517360              | 59.00                 |                   |
|                     | 005-126-AN    | ERS652711               | S -2.597583 E 35.918417  | 6624882             | 2595957        | 39.18          | 89.37      | 78.15      | 27799292        | 14926950              | 53.70                 |                   |
|                     | 005-132-AN    | ERS652629               | S -2.597583 E 35.918417  | 7227458             | 2866770        | 39.66          | 89.26      | 78.14      | 28531493        | 15518207              | 54.39                 |                   |
|                     | 11A-293-AN    | ERS652699               | S -2.591000 E 36.009445  | 3920796             | 1574459        | 40.16          | 89.29      | 78.86      | 22827759        | 10935424              | 47.90                 |                   |
|                     | 11A-296-AN    | ERS652698               | S -2.591000 E 36.009445  | 6773356             | 2775470        | 40.98          | 89.67      | 79.26      | 26283459        | 15225966              | 57.93                 |                   |
|                     | 11A-301-AN    | ERS652645               | S -2.591000 E 36.009445  | 5475056             | 2199871        | 40.18          | 89.39      | 78.79      | 24466137        | 13467064              | 55.04                 |                   |
|                     | 11A-308-AN    | ERS652616               | S -2.591000 E 36.009445  | 1739654             | 676957         | 38.91          | 89.92      | 79.92      | 18722285        | 4795225               | 25.61                 |                   |
|                     | 012-543-AN    | ERS652707               | S -2.618972 E 35.999806  | 5338238             | 3589974        | 67.25          | 87.37      | 75.91      | 20923070        | 4272347               | 20.42                 |                   |
|                     | 012-545-AN    | ERS652708               | S -2.618972 E 35.999806  | 7347420             | 4936444        | 67.19          | 87.44      | 75.93      | 23581234        | 6377516               | 27.04                 |                   |
|                     | 012-559-AN    | ERS652622               | S -2.618972 E 35.999806  | 5496640             | 3561925        | 64.80          | 87.30      | 75.83      | 22386833        | 5164868               | 23.07                 |                   |
|                     | 012-562-AN    | ERS652682               | S -2.618972 E 35.999806  | 2752934             | 1745377        | 63.40          | 86.95      | 75.61      | 17204226        | 2166627               | 12.59                 |                   |
|                     | 017-828-AN    | ERS652661               | S -2.456278 E 36.087806  | 15256986            | 8462298        | 55.47          | 88.72      | 77.68      | 29291995        | 17849726              | 60.94                 |                   |
|                     | 017-830-AN    | ERS652677               | S -2.456278 E 36.087806  | 3343728             | 1756241        | 52.52          | 88.95      | 78.57      | 20432579        | 6679634               | 32.69                 |                   |
|                     | 017-833-AN    | ERS652675               | S -2.456278 E 36.087806  | 11002348            | 5598092        | 50.88          | 88.45      | 77.71      | 28055294        | 16269760              | 57.99                 |                   |
| 017-839-AN          | ERS652678     | S -2.456278 E 36.087806 | 16709740                 | 9782809             | 58.55          | 89.09          | 78.19      | 29204312   | 17900731        | 61.29                 |                       |                   |
| <i>A. grahami</i>   | 018-859-AG    | ERS652693               | S -2.001139 E 36.231972  | 11332104            | 7316137        | 64.56          | 82.42      | 72.31      | 23007864        | 10787850              | 46.89                 | 86.70             |
|                     | 018-869-AG    | ERS652696               | S -2.001139 E 36.231972  | 4807842             | 3357909        | 69.84          | 88.68      | 77.91      | 18492529        | 4395507               | 23.77                 |                   |
|                     | 018-871-AG    | ERS652683               | S -2.001139 E 36.231972  | 38009624            | 25200827       | 66.30          | 87.96      | 77.04      | 33738637        | 21316544              | 63.18                 |                   |
|                     | 018-900-AG    | ERS652636               | S -2.001139 E 36.231972  | 7910266             | 5012316        | 63.36          | 88.45      | 77.57      | 23267126        | 10405216              | 44.72                 |                   |
|                     | 021-898-AG    | ERS652692               | S -1.844444 E 36.22425   | 2163910             | 1241469        | 57.37          | 87.69      | 77.22      | 16588390        | 2926140               | 17.64                 |                   |
|                     | 021-899-AG    | ERS652691               | S -1.844444 E 36.22425   | 37937308            | 27520245       | 72.54          | 88.14      | 76.64      | 29148312        | 18680203              | 64.09                 |                   |
|                     | 021-905-AG    | ERS652637               | S -1.844444 E 36.22425   | 22813336            | 14797603       | 64.86          | 87.29      | 76.42      | 28182867        | 17694293              | 62.78                 |                   |
|                     | 021-910-AG    | ERS652646               | S -1.844444 E 36.22425   | 4502606             | 2915439        | 64.75          | 88.26      | 77.65      | 19456528        | 5554263               | 28.55                 |                   |
|                     | 024-950-AG*   | ERS652676               | S -0.396028 E 36.107583  | 8081388             | 4910222        | 60.76          | 87.56      | 76.93      | 24052205        | 11267314              | 46.85                 |                   |
|                     | 024-952-AG*   | ERS652690               | S -0.396028 E 36.107583  | 3456626             | 1932130        | 55.90          | 87.36      | 76.91      | 20057343        | 5936464               | 29.60                 |                   |
|                     | 024-969-AG*   | ERS652648               | S -0.396028 E 36.107583  | 4365002             | 2897370        | 66.38          | 85.52      | 74.94      | 18065966        | 3914662               | 21.67                 |                   |
| 024-970-AG*         | ERS652666     | S -0.396028 E 36.107583 | 9962378                  | 4713690             | 47.31          | 84.30          | 74.34      | 26614209   | 15712608        | 59.04                 |                       |                   |
|                     | <b>TOTAL:</b> |                         |                          | 836345864           | 439397761      | N/A            | N/A        | N/A        | N/A             | N/A                   | N/A                   | N/A               |
|                     | <b>MEAN:</b>  |                         |                          | 8711936             | 4577060        | 49.75          | 88.64      | 77.94      | 25838916        | 12850898              | 47.10                 | N/A               |

\*indicates sample collected from introduced population at Lake Nakuru.  
Voucher specimens (unaccessioned) are held in the Day lab at UCL.

**Table S2. Data subsets and respective analyses conducted on RAD data**

|          | <b>Description</b>                                                           | <b>Sequences</b>                                                                                        | <b>Sites (n)</b> | <b>Variant (%)</b> | <b>Analyses</b>                                                   | <b>Figure</b>         |
|----------|------------------------------------------------------------------------------|---------------------------------------------------------------------------------------------------------|------------------|--------------------|-------------------------------------------------------------------|-----------------------|
| <b>A</b> | Full alignment of all mapped, filtered sites with data for >1 individual     | n=92 (ref. <i>O. niloticus</i> , 7 <i>O. amphimelas</i> , 84 <i>Alcolapia</i> )                         | 28,560,698       | 1.91               | p-distance                                                        | SI 11                 |
| <b>B</b> | Full alignment of all mapped, quality filtered sites, reduced taxa           | n=25 (ref. <i>O. niloticus</i> , 4 <i>O. amphimelas</i> , 20 <i>Alcolapia</i> )                         | 26,135,098       | 1.71               | RAxML<br>GTRGAMMA model                                           | 2A,B                  |
| <b>C</b> | Full alignment excluding reads not mapped to assigned linkage groups         | n=92 (ref. <i>O. niloticus</i> , 7 <i>O. amphimelas</i> , 84 <i>Alcolapia</i> )                         | 22,249,264       | 1.82               | LD, $f_4$<br>$F_{ST}$ (EggLib method),<br>Sliding-window $F_{ST}$ | 4,<br>Table1<br>SI 2, |
| <b>D</b> | Variable sites (SNPs) across full alignment                                  | n=92 (ref. <i>O. niloticus</i> , 7 <i>O. amphimelas</i> , 84 <i>Alcolapia</i> )                         | 544,916          | 100                | RAxML<br>GTRGAMMA model                                           | 2C                    |
| <b>E</b> | SNPs across full alignment, excluding ambiguous bases                        | n=92 (ref. <i>O. niloticus</i> , 7 <i>O. amphimelas</i> , 84 <i>Alcolapia</i> )                         | 366,016          | 100                | RAxML GTRGAMMA model, corrected for ascertainment bias            | SI 3                  |
| <b>F</b> | Biallelic unlinked SNPs 12 populations (n=4 per population), no missing data | n=48 (38 <i>A. alcalica</i> , 12 <i>A. grahami</i> , 19 <i>A. latilabris</i> , 15 <i>A. ndalalani</i> ) | 1,266            | 100                | SNAPP                                                             | SI 5                  |
| <b>G</b> | Full alignment, de novo assembled, filtered sites                            | n=91 (7 <i>O. amphimelas</i> , 84 <i>Alcolapia</i> )                                                    | 436,839          | 1.33               | RAxML<br>GTRGAMMA model                                           | SI 4A                 |
| <b>H</b> | SNPs from de novo assembled alignment                                        | n=91 (7 <i>O. amphimelas</i> , 84 <i>Alcolapia</i> )                                                    | 5,832            | 100                | RAxML<br>GTRGAMMA model                                           | SI 4B                 |
| <b>J</b> | SNPs from de novo, no ambiguous bases                                        | n=91 (7 <i>O. amphimelas</i> , 84 <i>Alcolapia</i> )                                                    | 1,898            | 100                | RAxML GTRGAMMA model, $\_ASC$ model                               | SI 4C                 |
| <b>K</b> | Combined mapped and de novo reads, SNPs                                      | n=91 (7 <i>O. amphimelas</i> , 84 <i>Alcolapia</i> )                                                    | 550,748          | 100                | RAxML GTRGAMMA model                                              | SI 4D                 |
| <b>L</b> | Combined mapped and de novo reads, SNPs, no ambiguous bases                  | n=91 (7 <i>O. amphimelas</i> , 84 <i>Alcolapia</i> )                                                    | 182,909          | 100                | RAxML GTRGAMMA model, $\_ASC$ model                               | SI 4E                 |
| <b>M</b> | Biallelic SNPs across <i>Alcolapia</i>                                       | n=84 (38 <i>A. alcalica</i> , 12 <i>A. grahami</i> , 19 <i>A. latilabris</i> , 15 <i>A. ndalalani</i> ) | 246,336          | 100                | STRUCTURE,<br>SplitsTree                                          | 2D,<br>SI 6           |
| <b>N</b> | Biallelic unlinked SNPs across <i>Alcolapia</i>                              | n=84 (38 <i>A. alcalica</i> , 12 <i>A. grahami</i> , 19 <i>A. latilabris</i> , 15 <i>A. ndalalani</i> ) | 2,297            | 100                | STRUCTURE                                                         | 3, SI 6               |
| <b>P</b> | <i>A. alcalica</i> biallelic SNPs                                            | n=38 <i>A. alcalica</i>                                                                                 | 173,964          | 100                | STRUCTURE                                                         | SI 8                  |
| <b>Q</b> | <i>A. alcalica</i> unlinked SNPs                                             | n=38 <i>A. alcalica</i>                                                                                 | 2,222            | 100                | STRUCTURE                                                         | SI 8                  |
| <b>R</b> | Biallelic SNPs, max missing data 10%                                         | n=84 (38 <i>A. alcalica</i> , 12 <i>A. grahami</i> , 19 <i>A. latilabris</i> , 15 <i>A. ndalalani</i> ) | 31,555           | 100                | $F_{ST}$ (Arlequin)                                               | Table<br>SI 3         |
| <b>S</b> | Biallelic SNPs, MAF >0.1, max. missing data 25%                              | n=16 (8 <i>A. alcalica</i> , 8 <i>A. grahami</i> )                                                      | 23,264           | 100                | Bayescan                                                          | Table<br>2            |
| <b>T</b> | Biallelic SNPs, MAF >0.1, max. missing data 25%                              | n=16 (8 <i>A. alcalica</i> , 8 <i>A. latilabris</i> )                                                   | 30,841           | 100                | Bayescan                                                          | Table<br>2            |
| <b>U</b> | Biallelic SNPs, MAF >0.1, max. missing data 25%                              | n=16 (8 <i>A. alcalica</i> , 8 <i>A. ndalalani</i> )                                                    | 28,026           | 100                | Bayescan                                                          | Table<br>2            |
| <b>V</b> | Biallelic SNPs, MAF >0.1, max. missing data 25%                              | n=16 (8 <i>A. latilabris</i> , 8 <i>A. ndalalani</i> )                                                  | 22,946           | 100                | Bayescan                                                          | Table<br>2            |
| <b>W</b> | Biallelic SNPs, MAF >0.1, max. missing data 25%                              | n=14 (7 <i>A. alcalica</i> , 7 <i>O. amphimelas</i> )                                                   | 82,474           | 100                | Bayescan                                                          | Table<br>2            |
| <b>X</b> | Biallelic unlinked SNPs, sympatric <i>Alcolapia</i>                          | n=24 (8 <i>A. alcalica</i> , 8 <i>A. latilabris</i> , 8 <i>A. ndalalani</i> )                           | 2,227            | 100                | STRUCTURE                                                         | SI 7                  |

**Table S3. Population pairwise F<sub>ST</sub>.**

Below diagonal: maximum level missing data 10%, 31,555 SNPs (dataset R), F<sub>ST</sub> calculated in Arlequin accounting for sample size.

| Site:                | <i>A. alcalica</i> |       |       |        |       |       |       |       |       | <i>A. latilabris</i> |       |       |       |       | <i>A. ndalalani</i> |       |        |       | <i>A. grahami</i> |        |     |
|----------------------|--------------------|-------|-------|--------|-------|-------|-------|-------|-------|----------------------|-------|-------|-------|-------|---------------------|-------|--------|-------|-------------------|--------|-----|
|                      | 005                | 006   | 009   | 011    | 012   | 015   | 015*  | 017   | 019   | 005                  | 009   | 011   | 012   | 017   | 005                 | 11A   | 012    | 017   | 018               | 021    | 024 |
| <i>A. alcalica</i>   | 005                | -     |       |        |       |       |       |       |       |                      |       |       |       |       |                     |       |        |       |                   |        |     |
|                      | 006                | 0.075 | -     |        |       |       |       |       |       |                      |       |       |       |       |                     |       |        |       |                   |        |     |
|                      | 009                | 0.038 | 0.039 | -      |       |       |       |       |       |                      |       |       |       |       |                     |       |        |       |                   |        |     |
|                      | 011                | 0.049 | 0.058 | 0.011  | -     |       |       |       |       |                      |       |       |       |       |                     |       |        |       |                   |        |     |
|                      | 012                | 0.056 | 0.084 | 0.017  | 0.016 | -     |       |       |       |                      |       |       |       |       |                     |       |        |       |                   |        |     |
|                      | 015                | 0.099 | 0.078 | 0.068  | 0.074 | 0.113 | -     |       |       |                      |       |       |       |       |                     |       |        |       |                   |        |     |
|                      | 015*               | 0.072 | 0.058 | 0.044  | 0.056 | 0.083 | 0.001 | -     |       |                      |       |       |       |       |                     |       |        |       |                   |        |     |
|                      | 017                | 0.029 | 0.053 | -0.003 | 0.001 | 0.004 | 0.074 | 0.034 | -     |                      |       |       |       |       |                     |       |        |       |                   |        |     |
|                      | 019                | 0.042 | 0.027 | 0.001  | 0.020 | 0.038 | 0.057 | 0.038 | 0.022 | -                    |       |       |       |       |                     |       |        |       |                   |        |     |
| <i>A. latilabris</i> | 005                | 0.063 | 0.117 | 0.072  | 0.083 | 0.096 | 0.126 | 0.105 | 0.059 | 0.087                | -     |       |       |       |                     |       |        |       |                   |        |     |
|                      | 009                | 0.146 | 0.158 | 0.085  | 0.127 | 0.147 | 0.174 | 0.151 | 0.135 | 0.116                | 0.132 | -     |       |       |                     |       |        |       |                   |        |     |
|                      | 011                | 0.102 | 0.124 | 0.078  | 0.084 | 0.104 | 0.138 | 0.115 | 0.075 | 0.091                | 0.080 | 0.082 | -     |       |                     |       |        |       |                   |        |     |
|                      | 012                | 0.132 | 0.153 | 0.101  | 0.115 | 0.118 | 0.176 | 0.153 | 0.110 | 0.121                | 0.106 | 0.146 | 0.026 | -     |                     |       |        |       |                   |        |     |
|                      | 017                | 0.053 | 0.137 | 0.042  | 0.043 | 0.050 | 0.100 | 0.072 | 0.018 | 0.039                | 0.067 | 0.093 | 0.033 | 0.030 | -                   |       |        |       |                   |        |     |
| <i>A. ndalalani</i>  | 005                | 0.090 | 0.126 | 0.071  | 0.076 | 0.109 | 0.154 | 0.120 | 0.069 | 0.081                | 0.108 | 0.191 | 0.140 | 0.159 | 0.099               | -     |        |       |                   |        |     |
|                      | 011                | 0.113 | 0.137 | 0.077  | 0.062 | 0.072 | 0.157 | 0.134 | 0.068 | 0.089                | 0.130 | 0.163 | 0.119 | 0.151 | 0.075               | 0.122 | -      |       |                   |        |     |
|                      | 012                | 0.072 | 0.101 | 0.047  | 0.031 | 0.065 | 0.126 | 0.105 | 0.037 | 0.058                | 0.105 | 0.150 | 0.088 | 0.116 | 0.041               | 0.092 | -0.014 | -     |                   |        |     |
|                      | 017                | 0.101 | 0.119 | 0.076  | 0.091 | 0.119 | 0.136 | 0.107 | 0.065 | 0.089                | 0.126 | 0.203 | 0.141 | 0.152 | 0.063               | 0.143 | 0.095  | 0.092 | -                 |        |     |
| <i>A. grahami</i>    | 018                | 0.112 | 0.123 | 0.100  | 0.100 | 0.119 | 0.137 | 0.114 | 0.075 | 0.089                | 0.150 | 0.185 | 0.154 | 0.189 | 0.108               | 0.164 | 0.168  | 0.141 | 0.156             | -      |     |
|                      | 021                | 0.088 | 0.103 | 0.077  | 0.090 | 0.093 | 0.119 | 0.094 | 0.056 | 0.070                | 0.126 | 0.170 | 0.140 | 0.170 | 0.097               | 0.124 | 0.150  | 0.123 | 0.139             | -0.010 |     |
|                      | 024                | 0.108 | 0.109 | 0.088  | 0.106 | 0.115 | 0.135 | 0.112 | 0.068 | 0.079                | 0.137 | 0.172 | 0.147 | 0.179 | 0.101               | 0.154 | 0.164  | 0.132 | 0.142             | 0.014  |     |

\*indicates *A. alcalica* upturned-mouth morph from site 015. Site 011 *A. alcalica* includes comparisons for the blue morph only (n=4). Site 017 *A. alcalica* population excludes the two samples designated *A. aff. ndalalani* from the ML analysis.

None of the comparisons was significant after Bonferroni correction for multiple testing ( $\alpha=0.0002$ ).

|  |       |  |       |  |       |  |       |
|--|-------|--|-------|--|-------|--|-------|
|  | <0.03 |  | <0.09 |  | <0.15 |  | >0.18 |
|  | <0.06 |  | <0.12 |  | <0.18 |  |       |

**Table S4. Bayescan outlier loci for *A. alcalica* vs *A. grahmi* comparison.**

| Chromosome  | Position (bp)   | q-value       | alpha         | F <sub>ST</sub> |
|-------------|-----------------|---------------|---------------|-----------------|
| LG1         | 4880146         | 0.0586        | 1.4117        | 0.3375          |
| LG2         | 12745226        | 0.0013        | 1.9795        | 0.4525          |
| LG3         | 1061977         | 0.0101        | 1.5942        | 0.3687          |
| LG3         | 3742179         | 0.0502        | 1.3959        | 0.3340          |
| LG4         | 26817200        | 0.0004        | 2.0652        | 0.4712          |
| LG5         | 3793947         | 0.0559        | 1.3943        | 0.3338          |
| LG7         | 29281646        | 0.0056        | 1.6455        | 0.3785          |
| LG7         | 36442432        | 0.0471        | 1.3312        | 0.3194          |
| LG8-24      | 12272405        | 0.0797        | 1.1819        | 0.2964          |
| LG8-24      | 12272651        | 0.0438        | 1.3566        | 0.3242          |
| LG8-24      | 25594923        | 0.0137        | 1.5359        | 0.3562          |
| LG8-24      | 25594939        | 0.0171        | 1.5360        | 0.3567          |
| LG11        | 3550520         | 0.0041        | 1.6499        | 0.3798          |
| LG11        | 18919683        | 0.0019        | 1.9887        | 0.4548          |
| LG11        | 18919756        | 0.0007        | 2.0520        | 0.4679          |
| LG11        | 18924298        | 0.0021        | 1.9969        | 0.4560          |
| LG11        | 19069888        | 0.0083        | 1.5753        | 0.3633          |
| LG11        | 27805595        | 0.0024        | 1.9866        | 0.4538          |
| LG11        | 28559170        | 0.0376        | 1.3798        | 0.3284          |
| <b>LG11</b> | <b>28627402</b> | <b>0.0194</b> | <b>1.5180</b> | <b>0.3538</b>   |
| LG12        | 11467527        | 0.0639        | 1.3757        | 0.3308          |
| LG12        | 17142862        | 0.0665        | 1.3650        | 0.3285          |
| LG12        | 31972729        | 0.0155        | 1.5884        | 0.3681          |
| LG16-21     | 16552748        | 0.0923        | 1.1154        | 0.2828          |
| LG16-21     | 27504075        | 0.0840        | 1.1515        | 0.2901          |
| LG16-21     | 30216099        | 0.0531        | 1.3876        | 0.3326          |
| LG16-21     | 34046293        | 0.0964        | 1.0475        | 0.2689          |
| LG16-21     | 34070668        | 0.0753        | 1.1640        | 0.2922          |
| LG17        | 8127213         | 0.0005        | 2.1170        | 0.4827          |
| LG17        | 11752066        | 0.0407        | 1.3877        | 0.3306          |
| LG18        | 25974009        | 0.0708        | 1.2016        | 0.2995          |
| LG20        | 15632809        | 0.0002        | 2.1519        | 0.4904          |
| LG20        | 15633007        | 0.0007        | 2.0637        | 0.4707          |
| LG20        | 16552727        | 0.0344        | 1.3964        | 0.3306          |
| LG20        | 20086617        | 0.0267        | 1.4571        | 0.3418          |
| LG23        | 1333779         | 0.0613        | 1.3773        | 0.3307          |
| UNK1        | 862049          | 0.0010        | 2.0539        | 0.4689          |
| UNK2        | 924286          | 0.0219        | 1.4948        | 0.3498          |
| UNK37       | 1009096         | 0.0882        | 1.1253        | 0.2850          |
| UNK73       | 339327          | 0.0317        | 1.3985        | 0.3302          |
| UNK107      | 485448          | 0.0290        | 1.4624        | 0.3433          |
| UNK121      | 459348          | 0.0070        | 1.6592        | 0.3818          |
| UNK121      | 526329          | 0.0016        | 2.0066        | 0.4587          |
| UNK268      | 158116          | 0.0118        | 1.5402        | 0.3570          |
| UNK495      | 49297           | 0.0243        | 1.3599        | 0.3199          |

Yellow shading indicates loci identified as outliers at FDR=0.05; green indicates additional outlier loci identified at FDR=0.10. LG refers to linkage groups from reference genome used for alignment (*O. niloticus*), UNK refer to unplaced scaffolds within the genome. Rows in bold indicate SNPs that were identified as outliers in multiple species comparisons.

**Table S5. Bayescan outlier loci for *A. alcalica* vs *A. latilabris* comparison.**

| Chromosome  | Position (bp)   | q-value       | alpha         | F <sub>ST</sub> |
|-------------|-----------------|---------------|---------------|-----------------|
| LG1         | 4417090         | 0.0279        | 1.7238        | 0.1941          |
| LG1         | 5534111         | 0.0454        | 1.6156        | 0.1827          |
| <b>LG1</b>  | <b>9901931</b>  | <b>0.0613</b> | <b>1.4219</b> | <b>0.1569</b>   |
| LG1         | 10030509        | 0.0000        | 2.6671        | 0.3491          |
| LG2         | 16182727        | 0.0302        | 1.5967        | 0.1750          |
| <b>LG4</b>  | <b>6651728</b>  | <b>0.0863</b> | <b>1.3118</b> | <b>0.1502</b>   |
| LG5         | 4507212         | 0.0001        | 2.2695        | 0.2731          |
| LG5         | 7280901         | 0.0002        | 2.2676        | 0.2726          |
| LG5         | 16192393        | 0.0010        | 2.2432        | 0.2706          |
| LG5         | 18234447        | 0.0964        | 1.4024        | 0.1683          |
| <b>LG5</b>  | <b>26185535</b> | <b>0.0018</b> | <b>1.9564</b> | <b>0.2204</b>   |
| LG6         | 8236011         | 0.0208        | 1.8866        | 0.2177          |
| LG7         | 11499980        | 0.0112        | 1.7708        | 0.1970          |
| LG7         | 19014506        | 0.0531        | 1.5305        | 0.1732          |
| LG7         | 20824106        | 0.0669        | 1.5258        | 0.1756          |
| LG7         | 22963036        | 0.0176        | 1.7324        | 0.1905          |
| LG7         | 22963066        | 0.0793        | 1.3838        | 0.1611          |
| LG11        | 2931392         | 0.0014        | 1.9671        | 0.2235          |
| LG11        | 6384781         | 0.0929        | 1.3452        | 0.1574          |
| <b>LG11</b> | <b>28627402</b> | <b>0.0586</b> | <b>1.4238</b> | <b>0.1569</b>   |
| LG12        | 21251407        | 0.0722        | 1.4556        | 0.1655          |
| LG13        | 28499021        | 0.0503        | 1.7080        | 0.1989          |
| LG15        | 9225207         | 0.0403        | 1.4965        | 0.1635          |
| LG16-21     | 3406817         | 0.0241        | 1.8808        | 0.2173          |
| <b>LG17</b> | <b>12926209</b> | <b>0.0559</b> | <b>1.5960</b> | <b>0.1842</b>   |
| <b>LG17</b> | <b>13007816</b> | <b>0.0008</b> | <b>2.0367</b> | <b>0.2327</b>   |
| <b>LG17</b> | <b>13007817</b> | <b>0.0004</b> | <b>2.0197</b> | <b>0.2299</b>   |
| <b>LG17</b> | <b>13087966</b> | <b>0.0003</b> | <b>2.0369</b> | <b>0.2321</b>   |
| <b>LG17</b> | <b>13091875</b> | <b>0.0006</b> | <b>2.0384</b> | <b>0.2327</b>   |
| LG17        | 13270025        | 0.0024        | 2.0738        | 0.2419          |
| LG17        | 20107222        | 0.0259        | 1.6703        | 0.1836          |
| <b>LG17</b> | <b>24302170</b> | <b>0.0002</b> | <b>2.1499</b> | <b>0.2514</b>   |
| LG17        | 24496689        | 0.0896        | 1.3553        | 0.1571          |
| LG18        | 18845531        | 0.0192        | 1.7296        | 0.1903          |
| <b>LG19</b> | <b>7542228</b>  | <b>0.0829</b> | <b>1.3681</b> | <b>0.1599</b>   |
| LG22        | 15261172        | 0.0641        | 1.4670        | 0.1658          |
| LG22        | 15287396        | 0.0033        | 1.9595        | 0.2231          |
| LG22        | 15287743        | 0.0479        | 1.6027        | 0.1819          |
| LG22        | 15308783        | 0.0159        | 1.7619        | 0.1956          |
| LG22        | 24241771        | 0.0050        | 1.9478        | 0.2221          |
| UNK5        | 717734          | 0.0159        | 1.8481        | 0.2093          |
| UNK24       | 342964          | 0.0075        | 1.7982        | 0.1976          |
| UNK38       | 128450          | 0.0695        | 1.4637        | 0.1662          |
| UNK43       | 367041          | 0.0059        | 1.8117        | 0.1995          |
| UNK50       | 526645          | 0.0327        | 1.5769        | 0.1735          |
| UNK50       | 820921          | 0.0067        | 1.8691        | 0.2082          |
| UNK56       | 765711          | 0.0757        | 1.3194        | 0.1496          |
| UNK89       | 110278          | 0.0428        | 1.7166        | 0.1987          |
| UNK95       | 37233           | 0.0000        | 2.3780        | 0.2906          |
| UNK103      | 307429          | 0.0352        | 1.6416        | 0.1842          |
| UNK168      | 164402          | 0.0095        | 1.8605        | 0.2107          |
| UNK168      | 356741          | 0.0129        | 1.8479        | 0.2091          |
| UNK181      | 262893          | 0.0041        | 2.0368        | 0.2363          |
| UNK234      | 123146          | 0.0224        | 1.8909        | 0.2175          |
| UNK300      | 208694          | 0.0376        | 1.6563        | 0.1864          |



**Table S6. Bayescan outlier loci for *A. alcalica* vs *A. ndalalani* comparison.**

| Chromosome    | Position (bp)   | q-value       | alpha         | F <sub>ST</sub> |
|---------------|-----------------|---------------|---------------|-----------------|
| LG1           | 3698842         | 0.0352        | 1.7403        | 0.1900          |
| <b>LG1</b>    | <b>9194783</b>  | <b>0.0163</b> | <b>1.9405</b> | <b>0.2195</b>   |
| LG1           | 11666374        | 0.0633        | 1.6592        | 0.1895          |
| LG1           | 11666684        | 0.0329        | 1.8688        | 0.2112          |
| LG1           | 13686376        | 0.0484        | 1.7399        | 0.1944          |
| LG1           | 13779141        | 0.0862        | 1.5656        | 0.1792          |
| LG1           | 25525499        | 0.0458        | 1.6611        | 0.1811          |
| LG2           | 2120367         | 0.0404        | 1.6649        | 0.1809          |
| LG2           | 4290091         | 0.0684        | 1.5324        | 0.1724          |
| LG2           | 7609602         | 0.0935        | 1.5470        | 0.1769          |
| <b>LG5</b>    | <b>26185535</b> | <b>0.0004</b> | <b>2.3241</b> | <b>0.2798</b>   |
| <b>LG6</b>    | <b>4117668</b>  | <b>0.0509</b> | <b>1.7374</b> | <b>0.1941</b>   |
| <b>LG6</b>    | <b>17839834</b> | <b>0.0823</b> | <b>1.5724</b> | <b>0.1796</b>   |
| LG6           | 18215001        | 0.0588        | 1.7313        | 0.1962          |
| LG7           | 22543193        | 0.0192        | 2.0224        | 0.2336          |
| LG7           | 30162091        | 0.0780        | 1.5133        | 0.1698          |
| <b>LG8-24</b> | <b>24244837</b> | <b>0.0371</b> | <b>1.8483</b> | <b>0.2084</b>   |
| <b>LG8-24</b> | <b>24244838</b> | <b>0.0279</b> | <b>1.8670</b> | <b>0.2107</b>   |
| <b>LG17</b>   | <b>12997082</b> | <b>0.0109</b> | <b>2.1182</b> | <b>0.2495</b>   |
| LG18          | 5413311         | 0.0973        | 1.4507        | 0.1629          |
| LG19          | 10882365        | 0.0560        | 1.5684        | 0.1697          |
| LG22          | 12765765        | 0.0240        | 1.7900        | 0.1981          |
| UNK33         | 1062913         | 0.0532        | 1.7395        | 0.1953          |
| UNK38         | 608444          | 0.0899        | 1.4973        | 0.1688          |
| UNK38         | 705388          | 0.0307        | 1.7390        | 0.1895          |
| UNK38         | 1274353         | 0.0432        | 1.6733        | 0.1820          |
| UNK86         | 245483          | 0.0780        | 1.5065        | 0.1689          |

**Table S7. Bayescan outlier loci for *A. latilabris* vs *A. ndalalani* comparison.**

| Chromosome    | Position (bp)   | q-value       | alpha         | F <sub>ST</sub> |
|---------------|-----------------|---------------|---------------|-----------------|
| <b>LG1</b>    | <b>9194783</b>  | <b>0.0093</b> | <b>1.8032</b> | <b>0.2771</b>   |
| <b>LG1</b>    | <b>9901931</b>  | <b>0.0126</b> | <b>1.5955</b> | <b>0.2388</b>   |
| LG2           | 9934672         | 0.0660        | 1.3796        | 0.2180          |
| LG2           | 14429342        | 0.0310        | 1.5541        | 0.2389          |
| <b>LG4</b>    | <b>6651728</b>  | <b>0.0078</b> | <b>1.7755</b> | <b>0.2716</b>   |
| LG4           | 24754695        | 0.0777        | 1.2336        | 0.1927          |
| LG4           | 24754717        | 0.0865        | 1.1954        | 0.1872          |
| LG4           | 24754718        | 0.0754        | 1.2382        | 0.1939          |
| LG4           | 24754744        | 0.0886        | 1.2212        | 0.1920          |
| LG5           | 15313237        | 0.0109        | 1.7306        | 0.2633          |
| LG5           | 16192182        | 0.0197        | 1.6607        | 0.2536          |
| LG5           | 28714028        | 0.0012        | 1.9178        | 0.2966          |
| LG5           | 30767236        | 0.0430        | 1.4680        | 0.2278          |
| <b>LG6</b>    | <b>4117668</b>  | <b>0.0156</b> | <b>1.6580</b> | <b>0.2514</b>   |
| LG6           | 14339857        | 0.0377        | 1.4534        | 0.2200          |
| <b>LG6</b>    | <b>17839834</b> | <b>0.0027</b> | <b>1.8484</b> | <b>0.2838</b>   |
| LG6           | 20814433        | 0.0327        | 1.5366        | 0.2361          |
| LG7           | 12555135        | 0.0000        | 2.4125        | 0.3987          |
| LG7           | 19277166        | 0.0256        | 1.4870        | 0.2239          |
| LG8-24        | 11575335        | 0.0550        | 1.4694        | 0.2308          |
| LG8-24        | 11575814        | 0.0101        | 1.7739        | 0.2717          |
| <b>LG8-24</b> | <b>24244837</b> | <b>0.0006</b> | <b>1.9295</b> | <b>0.2986</b>   |
| <b>LG8-24</b> | <b>24244838</b> | <b>0.0021</b> | <b>1.8577</b> | <b>0.2857</b>   |
| LG9           | 7012601         | 0.0185        | 1.6851        | 0.2577          |
| LG10          | 9537712         | 0.0050        | 1.7580        | 0.2680          |
| LG11          | 3792961         | 0.0978        | 1.1719        | 0.1873          |
| LG11          | 33302772        | 0.0135        | 1.6751        | 0.2546          |
| LG11          | 33302799        | 0.0175        | 1.6483        | 0.2500          |
| LG11          | 33303048        | 0.0931        | 1.1872        | 0.1893          |
| LG12          | 13411277        | 0.0593        | 1.3806        | 0.2155          |
| LG12          | 13411307        | 0.0614        | 1.3866        | 0.2170          |
| LG12          | 13411469        | 0.0572        | 1.3925        | 0.2174          |
| LG12          | 20337529        | 0.0410        | 1.4379        | 0.2185          |
| LG13          | 16810867        | 0.0033        | 1.8204        | 0.2792          |
| LG13          | 16811174        | 0.0450        | 1.4752        | 0.2287          |
| LG13          | 17422310        | 0.0906        | 1.2132        | 0.1905          |
| LG13          | 24877405        | 0.0707        | 1.2457        | 0.1939          |
| LG15          | 9632346         | 0.0754        | 1.2329        | 0.1929          |
| LG16-21       | 3603414         | 0.0069        | 1.7480        | 0.2664          |
| LG16-21       | 3636514         | 0.0509        | 1.5124        | 0.2372          |
| LG16-21       | 11594518        | 0.0166        | 1.6668        | 0.2539          |
| LG16-21       | 19134767        | 0.0489        | 1.4723        | 0.2285          |

Table continues on next page.

**Table S7. Bayescan outlier loci for *A. latilabris* vs *A. ndalalani* comparison (cont).**

| Chromosome  | Position (bp)   | q-value       | alpha         | F <sub>ST</sub> |
|-------------|-----------------|---------------|---------------|-----------------|
| LG17        | 7574728         | 0.0117        | 1.7670        | 0.2712          |
| <b>LG17</b> | <b>12926209</b> | <b>0.0000</b> | <b>2.5280</b> | <b>0.4228</b>   |
| <b>LG17</b> | <b>12997082</b> | <b>0.0001</b> | <b>2.3101</b> | <b>0.3776</b>   |
| <b>LG17</b> | <b>13007816</b> | <b>0.0000</b> | <b>2.1734</b> | <b>0.3470</b>   |
| <b>LG17</b> | <b>13007817</b> | <b>0.0000</b> | <b>2.1779</b> | <b>0.3472</b>   |
| <b>LG17</b> | <b>13087966</b> | <b>0.0001</b> | <b>2.1848</b> | <b>0.3488</b>   |
| <b>LG17</b> | <b>13091875</b> | <b>0.0001</b> | <b>2.1285</b> | <b>0.3372</b>   |
| <b>LG17</b> | <b>24302170</b> | <b>0.0344</b> | <b>1.4480</b> | <b>0.2192</b>   |
| LG17        | 31257285        | 0.0156        | 1.6701        | 0.2547          |
| LG18        | 5413298         | 0.0821        | 1.2147        | 0.1903          |
| LG18        | 18845531        | 0.0007        | 2.0042        | 0.3139          |
| LG19        | 3811871         | 0.0223        | 1.6530        | 0.2542          |
| <b>LG19</b> | <b>7542228</b>  | <b>0.0041</b> | <b>1.8116</b> | <b>0.2771</b>   |
| LG19        | 7542249         | 0.0239        | 1.6586        | 0.2565          |
| LG19        | 7544806         | 0.0209        | 1.6658        | 0.2545          |
| LG19        | 7545050         | 0.0394        | 1.5504        | 0.2396          |
| LG19        | 10903764        | 0.0361        | 1.5597        | 0.2408          |
| LG19        | 18829834        | 0.0955        | 1.2428        | 0.1999          |
| LG20        | 24059412        | 0.0060        | 1.7615        | 0.2691          |
| LG23        | 20226647        | 0.0843        | 1.2103        | 0.1898          |
| UNK1        | 878607          | 0.0003        | 2.0653        | 0.3250          |
| UNK1        | 1017116         | 0.0085        | 1.7675        | 0.2702          |
| UNK5        | 749629          | 0.0016        | 1.9485        | 0.3035          |
| UNK6        | 845852          | 0.0470        | 1.5323        | 0.2398          |
| UNK37       | 54509           | 0.0293        | 1.4777        | 0.2237          |
| UNK61       | 362040          | 0.0636        | 1.3645        | 0.2133          |
| UNK73       | 530939          | 0.0009        | 2.0214        | 0.3173          |
| UNK73       | 767643          | 0.0275        | 1.5579        | 0.2394          |
| UNK86       | 245483          | 0.0528        | 1.4519        | 0.2258          |
| UNK88       | 656959          | 0.0005        | 2.0535        | 0.3232          |
| UNK89       | 378951          | 0.0684        | 1.3800        | 0.2189          |
| UNK95       | 37233           | 0.0003        | 2.0702        | 0.3263          |

**Table S8. Outlier SNPs and predicted gene annotations.**

SNPs identified as  $F_{ST}$  outliers in more than one species comparison from Bayescan analyses and the corresponding predicted gene annotation from NCBI (*O. niloticus* annotation release 101). The final row includes the window identified as a peak in the  $D_{XY}$  sliding-window analysis, and includes all annotated genes within this 1.5MB region (although this peak was not identified in the Bayescan analysis).

| <b>Chromosome: bp</b>              | <b>Gene annotation</b>                                                                                                                                                                                                                                                                                                                                                                                                                                                                                                                                                                                                                                                                                                                                                                                                                             |
|------------------------------------|----------------------------------------------------------------------------------------------------------------------------------------------------------------------------------------------------------------------------------------------------------------------------------------------------------------------------------------------------------------------------------------------------------------------------------------------------------------------------------------------------------------------------------------------------------------------------------------------------------------------------------------------------------------------------------------------------------------------------------------------------------------------------------------------------------------------------------------------------|
| LG1: 9901931                       | Synaptotagmin-7-like (LOC100697404)                                                                                                                                                                                                                                                                                                                                                                                                                                                                                                                                                                                                                                                                                                                                                                                                                |
| LG1: 9194783                       | Growth arrest-specific protein 2-like (LOC100704610)                                                                                                                                                                                                                                                                                                                                                                                                                                                                                                                                                                                                                                                                                                                                                                                               |
| LG4: 6651728                       | Fascin-like (LOC100703702)                                                                                                                                                                                                                                                                                                                                                                                                                                                                                                                                                                                                                                                                                                                                                                                                                         |
| LG5: 26185535                      | No annotation                                                                                                                                                                                                                                                                                                                                                                                                                                                                                                                                                                                                                                                                                                                                                                                                                                      |
| LG6: 4117668                       | Suppressor of cytokine signaling 7-like (LOC100711954)                                                                                                                                                                                                                                                                                                                                                                                                                                                                                                                                                                                                                                                                                                                                                                                             |
| LG6: 17839834                      | Glyoxylate reductase/hydroxypyruvate reductase-like (LOC100699147)                                                                                                                                                                                                                                                                                                                                                                                                                                                                                                                                                                                                                                                                                                                                                                                 |
| LG8-24: 24244837, 24244838         | No annotation                                                                                                                                                                                                                                                                                                                                                                                                                                                                                                                                                                                                                                                                                                                                                                                                                                      |
| LG11: 28627402                     | Potassium voltage-gated channel subfamily V member 1-like (LOC100693033)                                                                                                                                                                                                                                                                                                                                                                                                                                                                                                                                                                                                                                                                                                                                                                           |
| LG17: 12926209                     | Exportin-T-like (LOC100695406)                                                                                                                                                                                                                                                                                                                                                                                                                                                                                                                                                                                                                                                                                                                                                                                                                     |
| LG17: 12997082, 13007816, 13007817 | No annotation                                                                                                                                                                                                                                                                                                                                                                                                                                                                                                                                                                                                                                                                                                                                                                                                                                      |
| LG17: 13087966, 13091875           | Parathyroid hormone-related protein-like (LOC100694874)                                                                                                                                                                                                                                                                                                                                                                                                                                                                                                                                                                                                                                                                                                                                                                                            |
| LG:17: 24302170                    | No annotation                                                                                                                                                                                                                                                                                                                                                                                                                                                                                                                                                                                                                                                                                                                                                                                                                                      |
| LG19: 7542228                      | Mitochondrial 2-oxodicarboxylate carrier-like (LOC100696078)                                                                                                                                                                                                                                                                                                                                                                                                                                                                                                                                                                                                                                                                                                                                                                                       |
| LG23: 3500000-5000000              | Probable G-protein coupled receptor 128-like (LOC102080577)<br>DPH3 homolog (LOC100702351)<br>Opsin-3-like (LOC100693866)<br>NACHT, LRR and PYD domains-containing protein 12-like (LOC100699918)<br>Leucine-rich repeat flightless-interacting protein 2-like (LOC100700729)<br>Ribonuclease inhibitor-like (LOC100702088)<br>Protein NLRC3-like<br>Tumor necrosis factor receptor superfamily member 14-like (LOC100703705)<br>Tumor necrosis factor receptor superfamily member 5-like (LOC102082670)<br>Caspase-1-like (LOC102076866)<br>Replication factor C subunit 4-like (LOC100704243)<br>Guanine nucleotide exchange factor DBS-like (LOC100704513)<br>Lactosylceramide 1,3-N-acetyl-beta-D-glucosaminyltransferase A-like (LOC102082918)<br>Epithelial cell transforming sequence 2 oncogene (ect2)<br>Neurologin-1-like (LOC100705052) |

**Table S9. Mantel test results.**

Mean genetic pairwise distance or population pairwise  $F_{ST}$  vs geographic distance between sampling sites.

| Geographic distance:          | Uncorrected p-distance |         |                |         | Pairwise $F_{ST}$ |         |                |         |
|-------------------------------|------------------------|---------|----------------|---------|-------------------|---------|----------------|---------|
|                               | Straight-line          |         | Lake-perimeter |         | Straight-line     |         | Lake-perimeter |         |
|                               | Observation            | P-value | Observation    | P-value | Observation       | P-value | Observation    | P-value |
| <b>Population comparisons</b> |                        |         |                |         |                   |         |                |         |
| <i>A. alcalica</i>            | -0.055                 | 0.513   | 0.118          | 0.355   | -0.027            | 0.398   | 0.013          | 0.456   |
| <i>A. latilabris</i>          | 0.604                  | 0.112   | 0.647          | 0.083   | 0.169             | 0.344   | 0.213          | 0.325   |
| <i>A. ndalalani</i>           | 0.859                  | 0.037   | 0.879          | 0.084   | 0.731             | 0.128   | 0.735          | 0.123   |
| <i>A. grahami</i>             | -0.092                 | 0.502   | -              | -       | 0.583             | 0.337   | -              | -       |
